# Supplementary material for: Thalamic reticular control of local sleep in mouse sensory cortex
Source: eLife. 2018 Dec 25;7:e39111. doi: 10.7554/eLife.39111 (PMC6342525; doi:10.7554/eLife.39111)
Supplement: Figure 2—source data 1. [file elife-39111-fig2-data1.xlsx]

## Sheet: Figure2
Figure 2 - source Data and statistics underlying Figure 2
(B)	Passive cellular properties										(D1 & D2)		Number of bursts from different holding membrane potential																						(E)	Mean maximal number of burst (between -65 and -60 mV)									(F)	Proportion of repetitive bursting TRN neurons
CELL	AREA	GEN	Ci (pF)	RMP (mV)		MEAN+/-SEM		Ci (pF)	RMP (mV)		CELL	AREA	GEN	BURST (-65 -60)	-90mV	-80mV	-75mV	-70mV	-65mV	-60mV	-55mV	-50mV		MEAN	-90mV	-80mV	-75mV	-70mV	-65mV	-60mV	-55mV	-50mV				CELL	AREA	GEN	BURST (-65 -60)		MEAN	BURST (-65 -60)				Observed	S1	AC	MD
B170329	S1	WT	65.3	-65		S1	WT	70+/-7	-63+/-2		B170329	S1	WT	4.625	0	0	0	1.25	3.5	5.75	5.75	1		S1 WT n=12	0	0.0208333	0.375	2.17167	4.09583	4.53417	3.53417	2.58333				B170329	S1	WT	4.625		S1 WT n=12	4.315				Bursty	11	9	5
C170329	S1	WT	84.7	-63		S1	Cav3.3 KO	48+/-3	-69+/-3		C170329	S1	WT	5.25	0	0	0	5	6	4.5	3	2.75		S1 Cav3.3 KO n=12	0	0	0	0.229167	0.666667	0.916667	0.916667	0.875				C170329	S1	WT	5.25		S1 Cav3.3 KO n=12	0.791667				Non-Bursty	1	4	9
E170329	S1	WT	72.6	-59		AC	WT	71+/-8	-61+/-3		E170329	S1	WT	5	0	0	1	3.25	5	5	3.25	1		AC WT n=13	0	0	1.23077	1.75	2.77308	3.25	2.53846	1.82692				E170329	S1	WT	5		AC WT n=13	3.01154				total	12	13	14
C170331	S1	WT	51.2	-53		AC	Cav3.3 KO	69+/-5	-65+/-3		C170331	S1	WT	3.25	0	0.25	2.5	4.25	3.5	3	1	0.25		AC Cav3.3 KO n=13	0	0	0	0.230769	0.576923	0.888462	0.807692	0.846154				C170331	S1	WT	3.25		AC Cav3.3 KO n=13	0.732692
E170331	S1	WT	66.3	-58		MD	WT	49+/-4	-70+/-2		E170331	S1	WT	3	0	0	1	2	3	3	1	0		MD WT n=14	0	0	0	1.23214	1.80357	1.80929	1.60714	1.32143				E170331	S1	WT	3		MD WT n=14	1.80643				bursty %	91.6667	69.2308	35.7143
B180423	S1	WT	66	-76.9		MD	Cav3.3 KO	54+/-7	-64+/-3		B180423	S1	WT	4.495	0	0	0	0.66	4.33	4.66	5	4.5		MD Cav3.3 KO n=11	0	0	0.0909091	0.0909091	0.329545	0.772727	0.818182	0.659091				B180423	S1	WT	4.495		MD Cav3.3 KO n=11	0.551136				non bursty %	8.33333	30.7692	64.2857
C180423	S1	WT	65.22	-52							C180423	S1	WT	0.5	0	0	0	0	0	1	1.75	2.5														C180423	S1	WT	0.5
D180423	S1	WT	61.7	-54							D180423	S1	WT	3.33	0	0	0	0	2.66	4	3.66	4														D180423	S1	WT	3.33							Expected	S1	AC	MD
E180423	S1	WT	130.5	-67		Shapiro-Wilk		Ci (pF)	RMP (mV)		E180423	S1	WT	8.665	0	0	0	1	8.33	9	6	5		SEM	-90mV	-80mV	-75mV	-70mV	-65mV	-60mV	-55mV	-50mV				E180423	S1	WT	8.665		SEM	BURST (-65 -60)				Bursty	7.69231	8.33333	8.97436
F180423	S1	WT	28.3	-69		S1	WT	0.045	0.65		F180423	S1	WT	2.915	0	0	0	1.4	2.33	3.5	2	2		S1 WT n=12	0	0.0208333	0.222971	0.52261	0.609782	0.572072	0.537947	0.515235				F180423	S1	WT	2.915		S1 WT n=12	0.573992				Non-Bursty	4.30769	4.66667	5.02564
G180423	S1	WT	80	-61		S1	Cav3.3 KO	0.47	0.33		G180423	S1	WT	4.875	0	0	0	5	5	4.75	4	3		S1 Cav3.3 KO n=12	0	0	0	0.12099	0.124367	0.0833333	0.0833333	0.0897176				G180423	S1	WT	4.875		S1 Cav3.3 KO n=12	0.0901563				total	12	13	14
H180423	S1	WT	70	-75		AC	WT	0.28	0.058		H180423	S1	WT	5.875	0	0	0	2.25	5.5	6.25	6	5		AC WT n=13	0	0	0.588663	0.461672	0.531134	0.679956	0.765778	0.712404				H180423	S1	WT	5.875		AC WT n=13	0.595567
AC70614	S1	Cav3.3 KO	44.7	-81		AC	Cav3.3 KO	0.53	0.48		AC70614	S1	Cav3.3 KO	1	0	0	0	1	1	1	1	1		AC Cav3.3 KO n=13	0	0	0	0.107647	0.136886	0.0776568	0.106495	0.104154				AC70614	S1	Cav3.3 KO	1		AC Cav3.3 KO n=13	0.0898443				Chi2=Σ((O-E)^2/E)
B170614	S1	Cav3.3 KO	30.9	-75		MD	WT	0.33	0.3		B170614	S1	Cav3.3 KO	0.625	0	0	0	0	0.25	1	1	0.5		MD WT n=14	0	0	0	0.498255	0.441789	0.312467	0.188462	0.160332				B170614	S1	Cav3.3 KO	0.625		MD WT n=14	0.373777
C170614	S1	Cav3.3 KO	45.3	-70		MD	Cav3.3 KO	0.36	0.197		C170614	S1	Cav3.3 KO	1	0	0	0	0	1	1	1	1		MD Cav3.3 KO n=11	0	0	0.0909091	0.0909091	0.124171	0.118966	0.121967	0.144099				C170614	S1	Cav3.3 KO	1		MD Cav3.3 KO n=11	0.101417				((O-E)^2)/E	1.42231	0.0533333	1.76007
D170614	S1	Cav3.3 KO	61.5	-78							D170614	S1	Cav3.3 KO	1	0	0	0	0	1	1	1	1														D170614	S1	Cav3.3 KO	1								2.53984	0.0952381	3.14299
E170614	S1	Cav3.3 KO	30.5	-80							E170614	S1	Cav3.3 KO	1	0	0	0	1	1	1	1	1														E170614	S1	Cav3.3 KO	1
F170614	S1	Cav3.3 KO	65.4	-78		Wilcoxon		p-value			F170614	S1	Cav3.3 KO	0.75	0	0	0	0	0.5	1	1	1														F170614	S1	Cav3.3 KO	0.75		Shapiro	p-value				chi2=	9.01378
AC80427	S1	Cav3.3 KO	67.0666	-56.512				Ci (pF)	RMP (mV)		AC80427	S1	Cav3.3 KO	0	0	0	0	0	0	0	0	0														AC80427	S1	Cav3.3 KO	0		S1 WT n=12	0.55				df=(#rows-1)*(#colums-1)=2
B180427	S1	Cav3.3 KO	52.3775	-67.5387		S1 WT vs Cav3.3 KO		0.007	0.09		B180427	S1	Cav3.3 KO	0.5	0	0	0	0	0	1	1	1														B180427	S1	Cav3.3 KO	0.5		S1 Cav3.3 KO n=12	0.002
C180427	S1	Cav3.3 KO	41	-57.7745		AC WT vs Cav3.3 KO		0.88	0.41		C180427	S1	Cav3.3 KO	1	0	0	0	0.75	1	1	1	1														C180427	S1	Cav3.3 KO	1		AC WT n=13	0.02				pchi2(9.01, df=2,lower.tail=FALSE
D180427	S1	Cav3.3 KO	46.9499	-51.978		MD WT vs Cav3.3 KO		0.68	0.22		D180427	S1	Cav3.3 KO	0.625	0	0	0	0	0.25	1	1	1														D180427	S1	Cav3.3 KO	0.625		AC Cav3.3 KO n=13	0.009				critical value for df 2 and alpha 0.05 is 5.99, so pchi2 <0.05 *
E180427	S1	Cav3.3 KO	56.8446	-70.552							E180427	S1	Cav3.3 KO	1	0	0	0	0	1	1	1	1														E180427	S1	Cav3.3 KO	1		MD WT n=14	0.0013
F180427	S1	Cav3.3 KO	34.7219	-63.6928							F180427	S1	Cav3.3 KO	1	0	0	0	0	1	1	1	1														F180427	S1	Cav3.3 KO	1		MD Cav3.3 KO n=11	0.33
B170216	AC	WT	115	-69							B170216	AC	WT	2.875	0	0	1.25	1.75	2.75	3	2	1														B170216	AC	WT	2.875							Pairwise comparison of proportions with p-value adjustment (holm method)
C170216	AC	WT	75.9	-54							C170216	AC	WT	2.125	0	0	0.5	1	1.75	2.5	2	0														C170216	AC	WT	2.125							Pairwise p-value	S1	AC
D170216	AC	WT	101	-68							D170216	AC	WT	3	0	0	0.25	1.75	2.75	3.25	3	2.75														D170216	AC	WT	3		AREA effect in WT					AC	0.37	-
E170216	AC	WT	36	-76							E170216	AC	WT	1	0	0	0	0.5	1	1	0	0														E170216	AC	WT	1		Kruskal-Wallis					MD	0.035	0.35
F170216	AC	WT	31.9	-72							F170216	AC	WT	2	0	0	0.5	1	1.5	2.5	1.25	1														F170216	AC	WT	2		chi-squared	16.195
G170216	AC	WT	49.1	-63							G170216	AC	WT	1	0	0	0	0	1	1	0.25	0														G170216	AC	WT	1		p-value	0.0003
AC70220	AC	WT	59.6	-51							AC70220	AC	WT	2.875	0	0	3	3.5	2.25	3.5	0	0														AC70220	AC	WT	2.875		PostHoc	Wilcoxon
C171017	AC	WT	79.9	-52							C171017	AC	WT	2.5	0	0	1	2.25	2.75	2.25	1	1														C171017	AC	WT	2.5		Bonferroni correction	significance: 0.05/3=0.016
D171017	AC	WT	53	-57							D171017	AC	WT	1.5	0	0	0.75	1	2	1	1	1														D171017	AC	WT	1.5			p-value
F171017	AC	WT	105.5	-51							F171017	AC	WT	1.125	0	0	1	1.5	1.25	1	1.25	1														F171017	AC	WT	1.125		S1 vs AC	0.053
AC71218	AC	WT	106.8	-53							AC71218	AC	WT	6	0	0	7.75	6.25	6	6	6	5														AC71218	AC	WT	6		S1 vs MD	0.0048
AC71219	AC	WT	30.9	-78							AC71219	AC	WT	5	0	0	0	0	3.75	6.25	7	2														AC71219	AC	WT	5		AC vs MD	0.055
B171219	AC	WT	72.6	-55							B171219	AC	WT	8.15	0	0	0	2.25	7.3	9	8.25	9														B171219	AC	WT	8.15
AC70511	AC	Cav3.3 KO	55.9	-76							AC70511	AC	Cav3.3 KO	0.4	0	0	0	0	0	0.8	0	0														AC70511	AC	Cav3.3 KO	0.4
AC70512	AC	Cav3.3 KO	64.5	-73							AC70512	AC	Cav3.3 KO	1	0	0	0	0	1	1	1	1														AC70512	AC	Cav3.3 KO	1		AREA effect in KO
B170512	AC	Cav3.3 KO	55.2	-80							B170512	AC	Cav3.3 KO	1	0	0	0	1	1	1	1	1														B170512	AC	Cav3.3 KO	1		Kruskal-Wallis
D170512	AC	Cav3.3 KO	38.9	-82							D170512	AC	Cav3.3 KO	1	0	0	0	0.5	1	1	1	1														D170512	AC	Cav3.3 KO	1		chi-squared	3.93
AC80502	AC	Cav3.3 KO	113.064	-57.9308							AC80502	AC	Cav3.3 KO	0.75	0	0	0	0	0.5	1	1	1														AC80502	AC	Cav3.3 KO	0.75		p-value	0.14
B180502	AC	Cav3.3 KO	86.3404	-52.2942							B180502	AC	Cav3.3 KO	0.5	0	0	0	0	0	1	1	1														B180502	AC	Cav3.3 KO	0.5		PostHoc	Wilcoxon
C180502	AC	Cav3.3 KO	53.63	-62.1782							C180502	AC	Cav3.3 KO	1	0	0	0	0.5	1	1	0	0														C180502	AC	Cav3.3 KO	1		Bonferroni correction	significance: 0.05/3=0.016
D180502	AC	Cav3.3 KO	72.4372	-67.9432							D180502	AC	Cav3.3 KO	0	0	0	0	0	0	0	1	1														D180502	AC	Cav3.3 KO	0			p-value
E180502	AC	Cav3.3 KO	73.0423	-67.2931							E180502	AC	Cav3.3 KO	0.5	0	0	0	0	0	1	1	1														E180502	AC	Cav3.3 KO	0.5		S1 vs AC	0.52
AC80503	AC	Cav3.3 KO	63.1844	-51.3429							AC80503	AC	Cav3.3 KO	0.5	0	0	0	0	0	1	1	1														AC80503	AC	Cav3.3 KO	0.5		S1 vs MD	0.06
B180503	AC	Cav3.3 KO	79.6239	-61.1727							B180503	AC	Cav3.3 KO	0.875	0	0	0	0	1	0.75	0.5	1														B180503	AC	Cav3.3 KO	0.875		AC vs MD	0.21
C180503	AC	Cav3.3 KO	80.2439	-59.3016							C180503	AC	Cav3.3 KO	1	0	0	0	1	1	1	1	1														C180503	AC	Cav3.3 KO	1
D180503	AC	Cav3.3 KO	65.1973	-54.4281							D180503	AC	Cav3.3 KO	1	0	0	0	0	1	1	1	1														D180503	AC	Cav3.3 KO	1
B171213	MD	WT	55.4	-75							B171213	MD	WT	1.125	0	0	0	0	1	1.25	1.5	1														B171213	MD	WT	1.125		GENOTYPE effect in each region
AC71214	MD	WT	60	-80							AC71214	MD	WT	1	0	0	0	0	1	1	1	1														AC71214	MD	WT	1		Wilcoxon	p-value
B171214	MD	WT	47.5	-62							B171214	MD	WT	1	0	0	0	1	1	1	1	1														B171214	MD	WT	1		S1 WT vs Cav3.3 KO	0.00036
AC31217	MD	WT	85.8	-76.3							AC31217	MD	WT	1.415	0	0	0	0	1	1.83	3	3														AC31217	MD	WT	1.415		AC WT vs Cav3.3 KO	4.9e-05
D180425	MD	WT	47.4217	-67.7742							D180425	MD	WT	1	0	0	0	0	1	1	1.75	1.25														D180425	MD	WT	1		MD WT vs Cav3.3 KO	0.0004
E180425	MD	WT	47.4296	-73.1862							E180425	MD	WT	1	0	0	0	0.25	1	1	1	1														E180425	MD	WT	1
F180425	MD	WT	60.9933	-57.9276							F180425	MD	WT	3.375	0	0	0	3.25	3.5	3.25	2	2														F180425	MD	WT	3.375
H180425	MD	WT	55.8322	-73.4331							H180425	MD	WT	2	0	0	0	0	2	2	1.75	1.25														H180425	MD	WT	2
I180425	MD	WT	48.523	-71.5489							I180425	MD	WT	0.5	0	0	0	0	0	1	1	1														I180425	MD	WT	0.5
K180425	MD	WT	45.4573	-67.9979							K180425	MD	WT	5.625	0	0	0	6.5	6.5	4.75	3	2														K180425	MD	WT	5.625
L180425	MD	WT	36.6817	-76.2056							L180425	MD	WT	2	0	0	0	1.25	2	2	1.5	1														L180425	MD	WT	2
M180425	MD	WT	32.3003	-68.734							M180425	MD	WT	1	0	0	0	1	1	1	1	1														M180425	MD	WT	1
N180425	MD	WT	40.4419	-70.9905							N180425	MD	WT	3.25	0	0	0	3	3.25	3.25	2	1														N180425	MD	WT	3.25
O180425	MD	WT	27.0329	-55.7786							O180425	MD	WT	1	0	0	0	1	1	1	1	1														O180425	MD	WT	1
AC71207	MD	Cav3.3 KO	60.6	-71							AC71207	MD	Cav3.3 KO	0.75	0	0	0	0	0.5	1	1	1														AC71207	MD	Cav3.3 KO	0.75
C171207	MD	Cav3.3 KO	44.1	-77							C171207	MD	Cav3.3 KO	0	0	0	0	0	0	0	0	0														C171207	MD	Cav3.3 KO	0
D171207	MD	Cav3.3 KO	23.7	-56							D171207	MD	Cav3.3 KO	0.625	0	0	0	0	0.25	1	1	1														D171207	MD	Cav3.3 KO	0.625
AC71208	MD	Cav3.3 KO	49.8	-59							AC71208	MD	Cav3.3 KO	0.5	0	0	0	0	0	1	1	1														AC71208	MD	Cav3.3 KO	0.5
B171208	MD	Cav3.3 KO	42.6	-81							B171208	MD	Cav3.3 KO	1	0	0	0	0	1	1	1	1														B171208	MD	Cav3.3 KO	1
D171208	MD	Cav3.3 KO	91.3	-69							D171208	MD	Cav3.3 KO	1	0	0	1	1	1	1	1	1														D171208	MD	Cav3.3 KO	1
AC71211	MD	Cav3.3 KO	35.6	-57							AC71211	MD	Cav3.3 KO	0.5	0	0	0	0	0	1	1	0														AC71211	MD	Cav3.3 KO	0.5
B171211	MD	Cav3.3 KO	30.6	-55							B171211	MD	Cav3.3 KO	0.375	0	0	0	0	0	0.75	1	1														B171211	MD	Cav3.3 KO	0.375
b071217	MD	Cav3.3 KO	93.2	-50							b071217	MD	Cav3.3 KO	0	0	0	0	0	0	0	0	0														b071217	MD	Cav3.3 KO	0
d081217	MD	Cav3.3 KO	60.9	-76							d081217	MD	Cav3.3 KO	0.5625	0	0	0	0	0.125	1	1	0.25														d081217	MD	Cav3.3 KO	0.5625
b111217	MD	Cav3.3 KO	63	-51							b111217	MD	Cav3.3 KO	0.75	0	0	0	0	0.75	0.75	1	1														b111217	MD	Cav3.3 KO	0.75
[truncated: 1 more columns]
