# Supplementary material for: Thalamic reticular control of local sleep in mouse sensory cortex
Source: eLife. 2018 Dec 25;7:e39111. doi: 10.7554/eLife.39111 (PMC6342525; doi:10.7554/eLife.39111)
Supplement: Figure 3—source data 1. [file elife-39111-fig3-data1.xlsx]

## Sheet: Figure3
Figure 3 - source Data and statistics underlying Figure 3
(D)
	Frequency (Hz)	S1- Mean PSD value during NREM sleep																						S1- Average accross mice					S2- Mean PSD value during NREM sleep
Genotype		WT	WT	WT	WT	WT	WT	WT	WT	WT	Cav3.3 KO	Cav3.3 KO	Cav3.3 KO	Cav3.3 KO	Cav3.3 KO	Cav3.3 KO	Cav3.3 KO	Cav3.3 KO	Cav3.3 KO	Cav3.3 KO	Cav3.3 KO	Cav3.3 KO	Cav3.3 KO	WT	WT	Cav3.3 KO	Cav3.3 KO		WT	WT	WT	WT	WT	WT	WT	WT	Cav3.3 KO	Cav3.3 KO	Cav3.3 KO	Cav3.3 KO	Cav3.3 KO	Cav3.3 KO	Cav3.3 KO	Cav3.3 KO	Cav3.3 KO	Cav3.3 KO	Cav3.3 KO	Cav3.3 KO	Cav3.3 KO
Mouse name		Gw5	Gw4	Cw8	Cw7	Cw6	Cw5	Cw3	Cw2	Cw1	Cc10	Cc9	Cc8	Cc7	Cc6	Cc5	Cc4	Cc2	Cc1	Gc2	Gc1	Fc4	Fc3	Mean	Sem	Mean	Sem		Gw5	Gw4	Cw8	Cw7	Cw6	Cw5	Cw3	Cw2	Gc2	Gc1	Fc4	Fc3	Cc10	Cc9	Cc8	Cc7	Cc6	Cc5	Cc4	Cc2	Cc1
	0	9.20062e-31	1.17243e-30	2.44007e-30	2.83337e-30	2.64188e-30	2.94135e-30	1.11685e-05	2.544e-30	9.94756e-31	8.03341e-31	1.21115e-30	8.44259e-31	1.10806e-30	1.63445e-30	1.71848e-30	3.65473e-30	1.04895e-05	2.10026e-30	1.85389e-30	8.56415e-31	1.24879e-30	8.2059e-31	1.24095e-06	1.24095e-06	8.06884e-07	8.06884e-07		8.72137e-31	1.56902e-30	2.92422e-30	2.49329e-30	1.96396e-30	1.94349e-30	1.22249e-05	2.26204e-30	1.61351e-30	7.38842e-31	1.01882e-30	9.43691e-31	7.92043e-31	9.63573e-31	9.48852e-31	7.69974e-31	1.9491e-30	2.30503e-30	2.21712e-30	1.05999e-05	1.45993e-30
	0.25	0.760858	1.07041	0.988189	1.12386	0.829544	0.95364	0.881909	0.847249	0.644237	0.48266	0.845377	0.904038	0.877344	0.464599	0.568524	1.48822	0.77663	0.63176	0.614323	0.528699	0.984844	0.470848	0.899989	0.0503676	0.741374	0.0798254		0.757143	1.99552	1.24675	0.922433	0.822107	0.696091	0.828219	0.956761	0.65827	0.490011	0.752428	0.776238	0.563797	0.859792	0.754753	0.90575	0.854845	0.988994	0.886872	0.727984	0.518385
	0.5	1.47178	1.99681	1.73383	2.80382	1.79513	2.49432	1.91452	1.78721	1.12034	1.0753	1.985	1.88825	1.8033	0.973694	1.4845	1.34054	1.56826	1.01552	1.23694	1.09246	1.7041	0.914645	1.90197	0.167591	1.39096	0.103323		1.21548	3.57244	2.55748	1.51477	1.82173	1.73794	2.05614	1.81199	1.30465	0.932772	1.34645	1.53391	1.21401	1.55104	1.40095	1.68127	1.55541	1.71413	1.37774	1.67486	1.20083
	0.75	2.06568	2.67629	2.88315	4.69546	3.16886	4.49226	3.3198	2.81618	2.32958	1.46407	2.71463	2.52255	2.63643	1.40264	2.15138	1.87929	2.78653	1.60921	1.88424	1.64633	2.34518	1.2964	3.16081	0.299865	2.02607	0.147317		1.64509	4.12854	3.63761	2.13987	2.93948	2.96561	2.98058	2.79839	1.82323	1.54568	2.12255	2.14699	1.51399	1.65007	2.13284	1.97785	1.90542	2.1619	1.90436	2.22666	1.81972
	1	2.65399	3.21989	4.05045	4.98008	4.03064	5.32289	4.20395	3.37714	3.58858	2.10862	3.58125	2.90488	3.73503	1.98541	2.52164	2.4629	3.22034	2.2198	2.64771	2.10231	2.88527	2.03179	3.9364	0.281287	2.64669	0.162974		2.05737	4.11193	4.26216	2.57476	3.59315	3.58784	4.06081	3.47285	2.291	1.6767	2.63157	2.39807	2.06319	1.95223	2.9943	2.13407	2.16428	2.59458	2.73485	2.60152	2.22553
	1.25	3.24727	3.41709	4.41142	4.80039	3.9703	5.21125	4.18677	3.44981	3.84667	2.5943	3.57508	3.22721	4.06483	2.50829	3.04636	2.62591	3.86344	3.0974	3.33579	2.72057	3.40026	2.54117	4.06011	0.220884	3.12312	0.142868		2.59967	3.98315	4.10394	2.67685	3.6965	4.00511	4.63447	3.52688	2.62427	1.94657	3.32304	2.747	2.47161	2.16755	4.06009	2.21402	2.3488	2.78913	3.02627	2.62979	2.83384
	1.5	3.57909	3.60165	4.04577	4.20441	3.90711	4.51298	4.56012	3.26094	4.04841	3.07526	3.75992	3.29583	4.80504	3.22636	3.62349	3.16465	4.30099	3.88551	4.39203	3.09057	3.92405	3.18558	3.96894	0.144583	3.67148	0.157001		2.84676	3.5394	4.1056	2.7087	3.45687	3.48942	4.32077	3.38322	3.03843	2.34548	3.73499	3.00099	3.17135	2.30769	4.60107	2.40597	2.53042	2.95429	3.04501	3.13936	3.28879
	1.75	3.87278	3.69217	4.08058	3.79645	3.52936	4.38758	4.65283	3.15005	3.88471	3.70887	4.20725	3.19802	5.12044	3.95042	3.64147	3.3912	4.62637	4.67835	4.91856	3.62479	4.03877	3.5491	3.89406	0.148673	4.05028	0.170536		3.06559	3.4397	3.19306	2.8966	2.99493	3.10513	4.08362	3.10592	3.35147	2.64298	3.805	3.01113	3.76313	2.50709	4.8431	2.44124	2.60426	3.32694	3.47045	3.38882	3.4905
	2	3.932	3.77383	4.36364	3.52853	3.40653	4.34881	4.16889	3.09899	3.80759	4.12174	3.90332	3.33148	5.12378	4.13364	4.25502	3.48781	4.41917	5.2785	5.21344	3.4868	4.11692	4.2734	3.82542	0.143722	4.24192	0.178183		3.38272	3.40553	3.05746	2.76298	2.86779	2.9894	3.92036	2.99653	3.49272	2.69624	3.85972	3.13553	3.77968	2.88005	5.19321	2.65344	2.88119	3.64916	3.43797	3.17453	3.82288
	2.25	3.98373	3.85049	3.99498	3.36227	3.34927	4.06757	3.98872	3.33424	4.1016	4.01075	3.78577	3.32419	4.6647	4.41249	4.68883	3.67105	4.48476	4.96193	5.31371	3.96892	4.0631	4.52212	3.78143	0.110623	4.29787	0.154165		3.5645	3.26191	3.19383	2.87759	2.61878	2.8059	3.67673	3.03289	3.51107	2.84959	4.3184	3.28246	3.59228	2.94013	5.51079	2.63582	3.01005	3.78104	3.69396	3.3459	3.91539
	2.5	4.22866	4.01877	4.37534	3.41532	3.34114	3.85585	4.06666	3.70716	4.72095	3.77291	3.87155	3.52411	4.88938	4.21517	4.40568	3.81898	4.58464	5.09598	5.40751	4.3825	4.1173	4.7935	3.96998	0.148703	4.37532	0.156313		3.68962	3.1827	2.98761	3.16684	2.58117	2.52111	3.41672	3.10497	3.68678	3.24961	4.355	3.55275	3.53166	3.30104	5.08882	3.13673	2.84225	3.80131	3.36344	3.3305	3.59451
	2.75	4.42608	4.07429	4.09812	3.74542	3.29324	4.02967	3.94021	3.56752	4.55189	4.21133	3.88983	3.62648	4.71563	4.26331	4.69799	4.10412	4.40785	4.85177	5.32643	5.1376	3.99802	4.87387	3.9696	0.131697	4.46956	0.141389		4.18001	3.13207	3.1979	3.2466	2.76506	2.80706	3.24229	3.261	3.79387	3.53576	4.29582	3.71278	3.73709	3.41493	5.33176	3.39811	2.9339	4.06931	3.76787	3.52936	4.13078
	3	4.50432	4.03368	4.03334	3.91928	3.43845	3.94958	3.75586	3.39648	3.70161	4.24005	4.02309	3.8971	4.50813	4.86818	4.62707	4.21906	4.6459	4.66314	5.01911	4.90626	4.20553	5.13544	3.85918	0.112755	4.53524	0.108781		4.20694	3.12932	2.85629	3.78984	2.86154	2.6806	3.46769	2.96034	3.83645	3.5341	4.45439	3.94672	3.57326	3.40322	5.28738	3.37625	3.45076	3.87522	4.11869	3.62858	4.1066
	3.25	4.25219	3.63585	3.76186	3.72153	3.3767	3.60282	3.75394	3.19171	3.95406	4.33002	3.88338	3.84457	4.30153	4.72184	4.69657	3.95513	3.87651	4.90834	4.73993	4.30193	4.53612	4.72714	3.69452	0.102255	4.371	0.105965		3.83815	2.76633	2.91635	3.57618	2.69379	2.41726	3.18016	2.89173	3.62362	3.5958	4.50501	3.85001	3.63957	3.71226	4.93566	3.64299	3.30705	3.92061	3.893	3.49629	4.01336
	3.5	3.48003	3.24241	3.96448	3.0838	3.23121	3.40674	3.964	3.23256	3.20884	3.88522	4.07856	3.48764	4.30127	4.17933	4.62914	3.25269	3.62821	4.51099	4.27201	3.69485	4.04686	4.74538	3.42379	0.109035	4.05478	0.125174		3.71706	2.60398	2.67713	3.07466	2.60771	2.43374	3.08809	2.92547	3.56169	3.4719	4.42898	3.76973	3.36286	3.70212	4.50059	3.52389	3.26653	3.76804	3.89621	3.03762	4.32052
	3.75	3.2698	2.89402	3.26828	2.9552	3.02061	3.14083	3.91346	2.99901	3.43302	3.82815	3.7435	3.41767	3.6862	4.24694	3.99865	2.99428	3.83241	4.1606	4.02837	3.48744	3.94826	4.24648	3.21047	0.105508	3.81684	0.0996817		3.36447	2.59258	2.62757	3.03454	2.52731	2.37402	2.84021	2.98452	3.48769	3.49669	3.90209	3.93893	2.88194	3.95425	4.20257	3.48927	3.57878	3.70297	3.62084	3.25759	4.23068
	4	2.84315	2.73117	3.16386	2.82562	2.89332	2.78703	3.50598	2.8557	2.85734	3.76694	3.52405	3.32831	3.50312	3.35934	3.563	2.92234	3.54099	4.13902	3.92959	3.22019	3.89292	3.93615	2.94035	0.0813119	3.58661	0.0940108		3.10541	2.507	2.39374	2.89085	2.41744	2.27224	2.6273	2.78362	3.69166	3.44918	3.53943	3.76293	2.91114	3.64092	3.77622	3.50978	3.10506	3.61757	3.33536	3.16241	3.79627
	4.25	2.64582	2.61044	2.92594	2.60865	2.90597	2.71787	3.16208	2.68285	2.86297	3.51213	3.22141	3.30706	3.11216	3.0662	3.15656	2.51544	3.27295	3.56548	3.44352	2.61352	3.90032	3.46234	2.7914	0.0621686	3.24224	0.10389		3.05898	2.30378	2.48428	2.74039	2.38311	2.18359	2.52647	2.61344	3.4117	3.59604	3.53725	3.51789	2.66325	3.77458	3.09743	3.51413	3.49652	3.35791	3.36249	3.14156	3.5282
	4.5	2.37894	2.33483	2.69502	2.39794	2.7769	2.44498	2.88406	2.51443	2.38774	2.95342	3.31157	3.15136	2.95854	2.76757	2.89256	2.29494	3.08893	3.25231	2.93211	2.71643	3.50827	2.9293	2.53498	0.0666025	2.98133	0.0840461		2.90643	2.35194	2.32651	2.6153	2.37488	2.10791	2.61239	2.68601	3.40054	3.37003	3.29154	3.30612	2.45764	3.59709	2.80487	3.55574	3.07029	2.9992	2.97757	3.39818	3.66771
	4.75	2.33144	2.20389	2.57198	2.224	2.58104	2.07163	2.62785	2.36386	2.16689	2.94321	2.63773	2.91282	2.71855	2.50123	2.62201	2.18903	2.77864	3.07968	2.59778	2.33233	3.2763	2.60437	2.34918	0.06756	2.7072	0.0821159		2.77144	2.09348	2.27537	2.69549	2.2224	1.914	2.36498	2.55381	3.171	3.55551	2.94738	3.01854	2.56389	3.38877	2.37903	2.92654	3.06552	2.92231	2.97641	3.28961	3.71243
	5	2.11781	2.06672	2.28377	2.08504	2.38359	1.97056	2.26766	2.18288	2.06229	2.60555	2.56863	2.78808	2.40066	2.09075	2.21217	1.96698	2.23768	2.65216	2.34309	2.10114	2.90034	2.38398	2.15781	0.043925	2.40394	0.0789596		2.78109	2.02616	2.17672	2.30661	2.13182	2.05277	2.1766	2.3973	3.0681	2.69352	2.64147	2.95627	2.38115	2.9666	2.12007	2.84803	2.96137	2.80252	2.73423	3.2383	2.98132
	5.25	1.92488	1.92943	2.09321	1.98256	2.28462	1.73932	2.12212	2.02154	1.86355	2.50031	2.27018	2.50465	2.1623	1.84243	2.18454	1.71947	2.20877	2.29718	1.96823	2.04716	2.56348	2.06245	1.99569	0.0530204	2.17932	0.07073		2.45891	1.92319	1.84231	2.33768	2.16473	1.92474	1.97132	2.30412	2.78376	3.18518	2.33342	2.45269	2.36107	2.70873	1.89392	2.75533	2.61491	2.63622	2.72732	2.84519	2.72467
	5.5	1.83767	1.87245	1.83211	1.72236	2.10478	1.51321	1.80605	2.05427	1.84341	2.21857	2.20546	2.27624	1.8472	1.70992	1.81468	1.69096	1.77483	1.9932	1.7225	1.91991	2.3932	1.68624	1.84292	0.057598	1.94253	0.0692416		2.28789	1.87708	1.97954	2.21039	1.99709	1.73675	1.86715	2.25184	2.4674	2.66906	2.12882	2.50449	2.35372	2.41605	1.53576	2.58485	2.51121	2.18757	2.47434	2.52525	2.73365
	5.75	1.69313	1.73568	1.77444	1.64076	1.95207	1.4435	1.59926	1.7735	1.48146	2.02799	2.13732	2.18887	1.64829	1.56135	1.66004	1.63385	1.64834	1.68497	1.52918	1.71575	1.99	1.4474	1.67709	0.0524786	1.75949	0.0669821		2.16684	1.7087	1.75986	2.13696	1.94027	1.79519	1.74141	2.06318	2.30171	2.54354	1.99947	2.18135	2.32333	2.30182	1.23725	2.19636	2.24206	2.13145	2.40569	2.25318	2.26428
	6	1.66316	1.73779	1.6046	1.47506	1.72463	1.30507	1.42217	1.64023	1.51929	1.82855	1.84374	1.8806	1.42788	1.37524	1.51135	1.39817	1.49443	1.59689	1.41247	1.73763	1.75518	1.34279	1.56578	0.0486395	1.585	0.0549879		2.00827	1.64116	1.61423	1.97758	1.71598	1.65385	1.54418	2.02377	2.17518	2.42805	1.82425	1.89591	2.1155	2.15109	1.22893	1.99834	2.16227	1.96143	2.02783	2.12358	1.93219
	6.25	1.65736	1.61522	1.48659	1.34606	1.63434	1.19641	1.35157	1.61244	1.37078	1.94724	1.54926	1.7232	1.26448	1.35821	1.3937	1.52131	1.40598	1.32601	1.23086	1.6296	1.52897	1.23862	1.47453	0.0549826	1.47057	0.0580585		1.77758	1.54105	1.6215	1.87138	1.70291	1.58382	1.48698	1.82265	1.97667	2.1151	1.61779	1.77207	2.46665	1.84279	1.08576	1.77748	1.92994	1.74047	2.09225	1.92233	1.72163
	6.5	1.60122	1.50765	1.35411	1.24695	1.45926	1.097	1.20801	1.44717	1.29298	1.5925	1.49165	1.49526	1.12416	1.27948	1.28291	1.28628	1.17558	1.20097	1.24593	1.54049	1.35272	1.14732	1.35715	0.0536118	1.32425	0.0436128		1.73063	1.45785	1.4671	1.75203	1.5344	1.41805	1.36693	1.74289	1.84203	1.91271	1.46446	1.54397	2.1597	1.64772	0.948871	1.4759	1.76099	1.61728	1.57407	1.83197	1.62351
	6.75	1.55262	1.49444	1.23619	1.19978	1.3254	1.00021	1.0618	1.39466	1.43577	1.59298	1.28657	1.37166	1.02045	1.33923	1.26888	1.3097	1.11465	1.02267	1.11325	1.50437	1.18035	1.03274	1.3001	0.0635077	1.24288	0.0508357		1.56347	1.39478	1.34508	1.59539	1.49747	1.41007	1.17428	1.66769	1.59471	1.91923	1.29894	1.39295	2.15109	1.45106	0.832049	1.42941	1.75122	1.55304	1.74874	1.64658	1.44592
	7	1.49338	1.40689	1.09609	1.04958	1.22617	0.935155	0.954529	1.37713	1.36927	1.33768	1.16415	1.19928	0.88959	1.19567	1.16383	1.34057	1.07764	0.977783	1.10601	1.32563	1.08088	1.01826	1.21202	0.0699315	1.14438	0.0387019		1.40266	1.24308	1.35987	1.5213	1.41496	1.3289	1.02083	1.50746	1.52169	1.61189	1.13912	1.20508	1.82126	1.29533	0.779052	1.38571	1.63692	1.30681	1.45492	1.43605	1.35397
	7.25	1.37089	1.32214	1.07353	1.01211	1.11546	0.886577	0.877378	1.25213	1.28371	1.18438	1.0593	1.11625	0.843149	1.19374	1.17563	1.42812	0.944614	0.898303	1.01464	1.35608	0.910687	0.946766	1.13266	0.0616663	1.08243	0.0500114		1.31471	1.22306	1.28848	1.40072	1.34459	1.29512	1.13876	1.31576	1.31914	1.59295	1.08312	1.10412	1.70023	1.14171	0.725121	1.268	1.33484	1.19618	1.34222	1.24749	1.1952
	7.5	1.35078	1.17962	0.955519	0.941103	1.01973	0.832993	0.816807	1.18505	1.16042	1.07945	0.928	0.956122	0.681044	1.21177	1.03049	1.19842	0.997163	0.769307	0.921275	1.334	0.882824	0.967374	1.04911	0.0601925	0.99671	0.0497386		1.20537	1.08492	1.20284	1.30953	1.2335	1.26533	1.02502	1.36889	1.13415	1.42934	0.931778	1.045	1.38334	1.03611	0.718411	1.15085	1.24569	1.07131	1.16964	1.28688	1.08562
	7.75	1.12142	1.1574	0.866783	0.893516	0.992303	0.750994	0.754689	1.29709	1.19453	1.04699	0.922813	0.930227	0.646921	1.08873	0.954918	1.37327	0.848009	0.694819	0.812306	1.24538	0.759185	0.924388	1.00319	0.0663381	0.94215	0.0576691		1.11982	1.06636	1.10844	1.23058	1.19716	1.18386	0.882403	1.20625	1.09115	1.31636	0.898382	0.905515	1.38519	1.03747	0.676087	1.11177	1.29258	1.00076	1.21949	1.042	0.929858
	8	1.15981	1.09405	0.853023	0.821038	0.935315	0.72587	0.71108	1.20941	1.03818	0.965103	0.872635	0.864041	0.602486	1.08422	0.912896	1.18333	0.742139	0.652292	0.722667	1.04161	0.721658	0.838705	0.949753	0.0616225	0.86183	0.0482765		1.05327	0.997187	1.03696	1.08681	1.12067	1.06015	0.872064	1.14674	0.964344	1.19519	0.732485	0.860664	1.35437	1.00768	0.625057	1.03819	1.13507	0.914161	1.04839	0.927295	0.796982
	8.25	1.07225	0.988484	0.805854	0.814352	0.852111	0.715574	0.749565	1.07785	0.95458	0.943649	0.757675	0.772245	0.583084	0.983488	0.920437	1.24934	0.646368	0.558889	0.654473	1.03908	0.614277	0.856075	0.892291	0.0451404	0.813776	0.0574891		0.968157	0.930163	0.951116	1.10422	1.0648	1.062	0.880391	1.09417	0.905007	1.063	0.732881	0.792934	1.15939	0.922095	0.582687	0.953581	1.02504	0.85287	0.829857	0.890166	0.744679
	8.5	0.946452	0.946567	0.724215	0.777038	0.847883	0.693009	0.687784	1.0327	1.04333	0.898188	0.673574	0.745515	0.519752	1.04829	0.779297	1.27236	0.635162	0.605016	0.571846	0.818136	0.631866	0.824785	0.855442	0.047321	0.77106	0.0581721		0.880655	0.861394	0.927261	1.01871	0.972722	1.03716	0.838897	0.996687	0.764365	0.928805	0.684831	0.755822	1.20515	0.829895	0.599845	0.893103	0.934376	0.761076	0.85814	0.775123	0.712835
	8.75	0.868063	0.854076	0.678659	0.731212	0.77064	0.678559	0.599346	1.05057	0.963008	0.812456	0.579117	0.709719	0.464031	0.864179	0.73247	1.01594	0.632059	0.560194	0.526631	0.895049	0.548889	0.733984	0.799349	0.0489103	0.698055	0.0457884		0.863003	0.837486	0.904169	0.978854	0.987077	1.03062	0.752933	0.976553	0.75199	0.849112	0.637608	0.7032	1.00409	0.765451	0.56007	0.907006	0.901394	0.715979	0.853234	0.813219	0.626942
	9	0.807669	0.83422	0.691846	0.678678	0.721838	0.623094	0.614096	0.993639	0.914765	0.815	0.635439	0.648736	0.445836	0.78395	0.672308	1.00977	0.581559	0.47276	0.464909	0.82435	0.532822	0.690456	0.764427	0.0439207	0.659838	0.0461227		0.76511	0.777693	0.814604	0.955629	0.963278	0.965746	0.737602	0.902755	0.677936	0.830083	0.563028	0.610022	1.05587	0.782047	0.52428	0.813166	0.755928	0.630486	0.772376	0.664993	0.596228
	9.25	0.742704	0.77513	0.613405	0.63543	0.733513	0.606388	0.560544	0.949222	0.742641	0.705242	0.550326	0.66433	0.41591	0.789601	0.669272	0.926248	0.591781	0.436038	0.434668	0.724645	0.476275	0.701904	0.706553	0.039443	0.622018	0.0429645		0.754213	0.732417	0.883548	0.865447	0.942532	0.957763	0.733177	0.877108	0.621458	0.787223	0.560159	0.648358	0.905246	0.706389	0.504941	0.759354	0.766559	0.634604	0.710035	0.664229	0.533346
	9.5	0.70454	0.740135	0.565709	0.608584	0.660455	0.587774	0.536257	0.886479	0.748119	0.65453	0.510478	0.591661	0.389872	0.73036	0.609283	0.873624	0.55214	0.425409	0.428415	0.71294	0.440626	0.656042	0.670895	0.0369795	0.582722	0.0397742		0.748515	0.687756	0.798891	0.799818	0.948078	0.935879	0.737779	0.784376	0.583736	0.695469	0.502921	0.577627	0.810167	0.669768	0.500036	0.713151	0.707332	0.59402	0.653781	0.641264	0.50589
	9.75	0.665886	0.724618	0.493833	0.605855	0.662935	0.522529	0.517531	0.841353	0.754582	0.696217	0.510003	0.575228	0.369002	0.717501	0.564512	0.915534	0.474049	0.412565	0.360476	0.696626	0.436811	0.617428	0.643236	0.0396623	0.565073	0.0449172		0.693387	0.66498	0.775866	0.795801	0.928592	0.939919	0.730529	0.840011	0.54908	0.720806	0.507136	0.52523	0.800679	0.615345	0.464973	0.689176	0.686304	0.506344	0.618898	0.555521	0.497278
	10	0.622213	0.672502	0.507216	0.573598	0.647548	0.497999	0.464364	0.815583	0.669002	0.632885	0.470979	0.545165	0.3658	0.654832	0.544619	0.761471	0.49933	0.372334	0.36379	0.611886	0.412402	0.61222	0.607781	0.0366686	0.526747	0.0350108		0.653839	0.653147	0.787225	0.788587	0.929698	0.947805	0.773518	0.726428	0.536543	0.652447	0.462271	0.523015	0.710227	0.647311	0.440301	0.702589	0.577055	0.517534	0.522005	0.557471	0.447891
	10.25	0.591914	0.635899	0.448676	0.544195	0.640635	0.527239	0.458265	0.760104	0.640373	0.591933	0.480947	0.541371	0.320037	0.598566	0.483801	0.878449	0.449751	0.354696	0.32556	0.619452	0.371722	0.583302	0.583033	0.0331398	0.507661	0.0428984		0.620105	0.62102	0.777339	0.740068	0.927637	0.992389	0.602371	0.71197	0.48711	0.646525	0.42577	0.5087	0.754111	0.618623	0.397447	0.603049	0.594552	0.50977	0.475627	0.558937	0.454496
	10.5	0.556435	0.577937	0.422019	0.547018	0.620024	0.505829	0.441917	0.711398	0.641421	0.536467	0.453856	0.520796	0.324251	0.589079	0.480856	0.765879	0.428228	0.353659	0.322496	0.597131	0.355682	0.540246	0.558222	0.031079	0.482202	0.0357709		0.590727	0.617968	0.698951	0.726752	0.933613	0.9399	0.65124	0.727284	0.486638	0.558366	0.423322	0.514321	0.628363	0.552236	0.374153	0.570765	0.566734	0.477263	0.511518	0.484346	0.434014
	10.75	0.493987	0.555526	0.444786	0.496098	0.578249	0.47148	0.438499	0.709265	0.634981	0.525231	0.39334	0.469977	0.323268	0.524936	0.447132	0.743742	0.379005	0.328289	0.301106	0.517474	0.326711	0.515787	0.535875	0.0305802	0.445846	0.0342612		0.555016	0.60317	0.777211	0.711513	0.893191	0.932503	0.670556	0.709555	0.438657	0.562271	0.389694	0.501854	0.572605	0.522597	0.336695	0.552092	0.514693	0.478987	0.464592	0.489771	0.394836
	11	0.504517	0.543942	0.419664	0.470206	0.581185	0.445405	0.414732	0.640813	0.517963	0.484685	0.354283	0.461114	0.281619	0.526044	0.443489	0.74744	0.362102	0.317274	0.293596	0.531312	0.315375	0.521275	0.50427	0.0253098	0.433816	0.0366332		0.538023	0.562609	0.740398	0.674685	0.85048	0.974358	0.589967	0.696166	0.459743	0.524822	0.363292	0.449586	0.570933	0.467688	0.327996	0.563815	0.534287	0.416705	0.44077	0.459933	0.366712
	11.25	0.473561	0.49284	0.364537	0.470244	0.554699	0.450041	0.417636	0.626303	0.519915	0.478694	0.37058	0.42873	0.26758	0.515809	0.40295	0.658611	0.345386	0.291607	0.280025	0.510785	0.303519	0.461123	0.485531	0.0254739	0.408877	0.0319392		0.508066	0.527262	0.69133	0.670013	0.897599	0.90004	0.613809	0.676619	0.419605	0.515111	0.353369	0.435054	0.510432	0.496562	0.330232	0.529313	0.508089	0.408668	0.429424	0.446332	0.335202
	11.5	0.426882	0.477592	0.392241	0.466489	0.543104	0.420605	0.388509	0.622302	0.429177	0.439584	0.371623	0.418844	0.275521	0.455792	0.389709	0.59639	0.367491	0.291847	0.259591	0.469397	0.294719	0.447389	0.462989	0.0255006	0.390608	0.0264911		0.463463	0.559738	0.676269	0.613912	0.910421	0.911969	0.537085	0.641891	0.402786	0.44756	0.344684	0.438986	0.51086	0.44707	0.28668	0.514916	0.475409	0.390739	0.449583	0.451238	0.33883
	11.75	0.402673	0.467251	0.350051	0.453841	0.545421	0.40225	0.360055	0.564989	0.439474	0.384915	0.319582	0.405325	0.262544	0.439999	0.337251	0.554383	0.322397	0.276304	0.238442	0.447156	0.276836	0.404209	0.442889	0.0249709	0.35918	0.0250847		0.472375	0.539557	0.645488	0.601383	0.843803	0.820353	0.551845	0.569718	0.375603	0.481816	0.29697	0.397341	0.417975	0.447597	0.28221	0.50255	0.472722	0.362708	0.345699	0.43036	0.324402
	12	0.393111	0.44513	0.332642	0.427896	0.48608	0.409817	0.361092	0.538326	0.396823	0.357866	0.310104	0.385719	0.234991	0.43208	0.348484	0.5048	0.314133	0.255741	0.230401	0.453187	0.268296	0.417678	0.421213	0.020921	0.347191	0.024434		0.434508	0.512417	0.635553	0.603172	0.725587	0.823893	0.48991	0.577816	0.374958	0.46344	0.304691	0.376521	0.409629	0.405556	0.262409	0.455541	0.428919	0.353672	0.327577	0.415287	0.308813
	12.25	0.375744	0.407656	0.322147	0.406598	0.5024	0.391144	0.347031	0.510797	0.372247	0.354402	0.31064	0.35113	0.219222	0.383657	0.318142	0.459819	0.308224	0.230955	0.220887	0.400619	0.268271	0.377878	0.403974	0.021417	0.323373	0.0206108		0.410904	0.489183	0.603028	0.540978	0.757045	0.729653	0.488171	0.580921	0.355425	0.454281	0.280149	0.366458	0.402205	0.38119	0.236939	0.456094	0.410896	0.334794	0.296411	0.385599	0.287934
	12.5	0.368791	0.405512	0.3367	0.400243	0.509526	0.375526	0.354427	0.489507	0.337428	0.32244	0.284029	0.348243	0.210196	0.382376	0.281462	0.441253	0.279067	0.237188	0.215092	0.381137	0.243195	0.34859	0.397518	0.0209346	0.305713	0.0198669		0.386922	0.464306	0.644781	0.537128	0.701022	0.78804	0.531836	0.538239	0.334997	0.392957	0.262762	0.342641	0.345407	0.361632	0.230841	0.418203	0.42088	0.316447	0.33321	0.388226	0.282104
	12.75	0.341459	0.370596	0.316954	0.424338	0.474416	0.359681	0.333934	0.467187	0.346562	0.328853	0.293943	0.35069	0.207634	0.339745	0.281873	0.429811	0.275379	0.220859	0.193466	0.365692	0.238511	0.328182	0.381681	0.0195995	0.296511	0.0192288		0.374312	0.470336	0.558451	0.499506	0.66643	0.743761	0.469653	0.49825	0.327358	0.399404	0.259526	0.323826	0.333229	0.370287	0.233092	0.411399	0.398542	0.30586	0.291816	0.352913	0.273783
	13	0.315689	0.349109	0.308527	0.396691	0.441542	0.342485	0.311457	0.439241	0.322182	0.291702	0.269189	0.332095	0.209635	0.336191	0.258872	0.421092	0.264894	0.212012	0.188059	0.340426	0.224625	0.3265	0.358547	0.0179042	0.282715	0.0185219		0.364599	0.436339	0.532295	0.463952	0.591868	0.683513	0.454527	0.488134	0.317591	0.39125	0.239835	0.332039	0.292563	0.343852	0.221158	0.377527	0.364382	0.290336	0.272499	0.354118	0.282181
	13.25	0.316764	0.343017	0.264996	0.371254	0.425232	0.324459	0.318511	0.42728	0.3064	0.286568	0.249892	0.300511	0.19997	0.320427	0.245986	0.389734	0.241645	0.20666	0.181223	0.349994	0.203449	0.304762	0.344212	0.0181454	0.267756	0.0176573		0.34002	0.418992	0.47175	0.447031	0.582356	0.619925	0.438528	0.43033	0.311596	0.368587	0.231717	0.315229	0.297885	0.339225	0.207635	0.37972	0.372356	0.284377	0.297873	0.314669	0.248881
	13.5	0.297916	0.310628	0.279587	0.348619	0.410916	0.311126	0.294998	0.392659	0.308143	0.237663	0.226286	0.309491	0.183386	0.291862	0.228394	0.355337	0.217216	0.208202	0.168063	0.306531	0.197269	0.297066	0.328288	0.0152748	0.248213	0.015951		0.331275	0.404043	0.437717	0.437362	0.546818	0.600179	0.408452	0.414985	0.296502	0.348576	0.236195	0.295807	0.243205	0.322395	0.189535	0.36438	0.355831	0.271077	0.248621	0.329588	0.241559
	13.75	0.272613	0.3116	0.264118	0.337032	0.3858	0.303444	0.25482	0.372837	0.289849	0.250181	0.249512	0.285373	0.182285	0.284463	0.227217	0.364375	0.201735	0.173409	0.164252	0.301126	0.189438	0.279541	0.310235	0.0155562	0.242531	0.0165256		0.311452	0.378053	0.434161	0.412419	0.499709	0.553334	0.383351	0.38428	0.281934	0.364684	0.220212	0.299784	0.238466	0.308535	0.185472	0.34831	0.326835	0.266388	0.238228	0.319816	0.213172
	14	0.277023	0.287053	0.249442	0.30914	0.377913	0.27845	0.263812	0.353473	0.292848	0.247765	0.204334	0.278042	0.167346	0.268437	0.2055	0.322761	0.205595	0.178421	0.153478	0.310001	0.192539	0.267787	0.298795	0.0139827	0.230924	0.0152379		0.300067	0.352778	0.404565	0.363216	0.455556	0.528371	0.350085	0.36016	0.268425	0.319609	0.208267	0.291101	0.248241	0.321835	0.171659	0.349629	0.305617	0.248558	0.234041	0.305173	0.224662
	14.25	0.258718	0.271156	0.237948	0.289869	0.347475	0.267849	0.229728	0.329007	0.271756	0.212183	0.202067	0.266239	0.154652	0.252471	0.189818	0.299237	0.195581	0.157765	0.149989	0.253074	0.176377	0.239467	0.278167	0.0129444	0.211455	0.013115		0.279585	0.355862	0.377992	0.35261	0.433359	0.504866	0.325617	0.346439	0.266484	0.2888	0.192819	0.289566	0.229019	0.2973	0.171644	0.335818	0.305788	0.238631	0.231203	0.283346	0.221042
	14.5	0.234638	0.270528	0.231971	0.280595	0.333027	0.244352	0.229809	0.335652	0.231866	0.196379	0.203378	0.257584	0.154994	0.253542	0.192505	0.283128	0.184398	0.163847	0.143074	0.235014	0.1621	0.222531	0.265827	0.0142704	0.204037	0.0121287		0.272457	0.322786	0.364901	0.336293	0.429242	0.491807	0.308341	0.328189	0.243227	0.27323	0.180106	0.252546	0.221215	0.295246	0.154637	0.303949	0.311313	0.237053	0.201619	0.285003	0.204688
	14.75	0.225947	0.24967	0.222436	0.26261	0.29902	0.236938	0.211579	0.288497	0.25408	0.192975	0.183933	0.245537	0.15727	0.223833	0.174877	0.283508	0.173543	0.161279	0.131655	0.247638	0.161093	0.211408	0.250086	0.00989232	0.196042	0.0121317		0.256915	0.32617	0.329824	0.336221	0.399738	0.436274	0.312486	0.300045	0.250696	0.310692	0.182913	0.22983	0.186411	0.295846	0.144301	0.314339	0.295736	0.227274	0.210305	0.256976	0.195547
	15	0.210486	0.240531	0.205808	0.237549	0.276185	0.215196	0.199297	0.274433	0.22496	0.201609	0.18174	0.24142	0.149461	0.196956	0.160909	0.252993	0.161668	0.152138	0.125174	0.223968	0.148538	0.220665	0.231605	0.00943207	0.185941	0.0111491		0.245003	0.31525	0.308392	0.296839	0.385072	0.412299	0.289347	0.292641	0.236138	0.249183	0.170988	0.245228	0.200119	0.281649	0.143078	0.288179	0.24812	0.202003	0.183193	0.235148	0.206116
	15.25	0.211395	0.223164	0.16958	0.241586	0.262679	0.198461	0.196571	0.260151	0.19811	0.181902	0.178249	0.238562	0.145851	0.194506	0.165576	0.252557	0.170668	0.139013	0.13067	0.212697	0.143822	0.20838	0.217966	0.0105282	0.181727	0.0106308		0.239808	0.295809	0.293691	0.288333	0.341126	0.395136	0.285265	0.28422	0.223545	0.271603	0.162577	0.239418	0.196662	0.254968	0.126865	0.277702	0.256476	0.2069	0.169042	0.256983	0.168132
	15.5	0.195668	0.222027	0.178601	0.201147	0.251794	0.18967	0.191484	0.240986	0.176815	0.166507	0.172903	0.219923	0.135141	0.192637	0.151759	0.227748	0.158407	0.129478	0.119807	0.211663	0.137039	0.186542	0.205355	0.00896319	0.169966	0.00990331		0.228795	0.28326	0.294651	0.269532	0.358792	0.362713	0.267999	0.260139	0.206076	0.242484	0.166137	0.217694	0.176516	0.232116	0.12589	0.260882	0.237166	0.203785	0.17651	0.245058	0.170715
	15.75	0.183059	0.204543	0.158701	0.200347	0.234757	0.173203	0.173165	0.22253	0.196236	0.160737	0.162322	0.215942	0.137474	0.190386	0.158388	0.242089	0.152406	0.132439	0.11781	0.191255	0.133033	0.173034	0.19406	0.00821907	0.166716	0.00986843		0.223663	0.26375	0.276071	0.251744	0.310341	0.368658	0.251779	0.242681	0.212203	0.215113	0.150626	0.2335	0.166536	0.234798	0.117528	0.27126	0.247196	0.194099	0.177327	0.237959	0.158477
	16	0.176329	0.186213	0.170067	0.184216	0.211122	0.169933	0.160745	0.223349	0.165335	0.173512	0.14816	0.211983	0.131417	0.183027	0.138982	0.20673	0.148538	0.137984	0.109227	0.191003	0.12772	0.186792	0.183035	0.00709118	0.16116	0.00909184		0.212793	0.259963	0.242608	0.250584	0.296802	0.33056	0.24276	0.220024	0.20254	0.221268	0.14469	0.216098	0.158407	0.223354	0.11352	0.252772	0.238019	0.186153	0.151359	0.21778	0.15151
	16.25	0.166081	0.192216	0.150871	0.170411	0.215248	0.156564	0.155434	0.202185	0.170647	0.157016	0.157191	0.216658	0.121766	0.170371	0.141418	0.201337	0.135974	0.114186	0.108109	0.180715	0.122809	0.167987	0.175517	0.00752536	0.153503	0.00931863		0.21208	0.24895	0.23236	0.224956	0.290038	0.322356	0.228416	0.21108	0.18993	0.232193	0.142345	0.220093	0.158874	0.217209	0.106768	0.249943	0.237664	0.179579	0.143406	0.206502	0.153019
	16.5	0.161029	0.175019	0.136963	0.170074	0.18793	0.150957	0.143021	0.198842	0.161619	0.146598	0.150871	0.195374	0.117208	0.166421	0.128966	0.178355	0.134195	0.121816	0.10098	0.170998	0.116986	0.167092	0.16505	0.00676052	0.145835	0.00788831		0.193242	0.227966	0.220476	0.234392	0.262753	0.305631	0.220341	0.200583	0.186615	0.200697	0.131859	0.203382	0.134045	0.213037	0.102767	0.22161	0.226376	0.171165	0.136708	0.218763	0.137467
	16.75	0.159875	0.174076	0.133894	0.16104	0.174051	0.138316	0.139162	0.184104	0.157112	0.132896	0.137574	0.189283	0.111944	0.159144	0.128804	0.200336	0.131941	0.119258	0.0988488	0.166961	0.11647	0.152086	0.157959	0.00593305	0.141965	0.00838563		0.198082	0.225369	0.209955	0.217306	0.250736	0.292445	0.208173	0.191507	0.174275	0.190092	0.131679	0.201855	0.131784	0.213534	0.105205	0.222313	0.228282	0.167856	0.136386	0.188109	0.140691
	17	0.154613	0.166679	0.123326	0.15221	0.158936	0.130641	0.12586	0.183554	0.152276	0.12659	0.134719	0.186344	0.111259	0.145254	0.117866	0.179223	0.118684	0.110386	0.094933	0.14852	0.110431	0.135058	0.149788	0.00664984	0.132251	0.00750667		0.189981	0.211071	0.190161	0.208725	0.229018	0.26388	0.191681	0.180933	0.175399	0.17462	0.132301	0.188193	0.12854	0.22161	0.0971136	0.219786	0.21112	0.152323	0.130631	0.176669	0.133632
	17.25	0.142478	0.157903	0.117925	0.137208	0.158687	0.124666	0.119447	0.175338	0.129526	0.123524	0.122174	0.182631	0.10691	0.14027	0.109127	0.167626	0.10697	0.0983374	0.089992	0.1424	0.10321	0.138856	0.140353	0.00665186	0.125541	0.00767449		0.180454	0.192844	0.182009	0.191837	0.213231	0.249766	0.184262	0.167693	0.154903	0.180539	0.115522	0.185377	0.128042	0.199715	0.0876824	0.222729	0.208196	0.148505	0.130287	0.174658	0.127434
	17.5	0.137109	0.146106	0.110684	0.129127	0.147323	0.114351	0.113787	0.166617	0.142292	0.114988	0.129288	0.183522	0.106955	0.141247	0.115919	0.174515	0.111327	0.112389	0.0829934	0.146016	0.0977311	0.1328	0.134155	0.00626734	0.126899	0.00799717		0.163835	0.193086	0.185638	0.188266	0.2066	0.238047	0.181789	0.161811	0.157376	0.175647	0.110531	0.186396	0.11375	0.20102	0.0887243	0.209314	0.194582	0.157316	0.126299	0.167372	0.123832
	17.75	0.131396	0.138658	0.107985	0.122707	0.144266	0.106275	0.104993	0.155459	0.121481	0.112716	0.116879	0.163159	0.0945089	0.155472	0.105472	0.166265	0.112393	0.104604	0.0814749	0.140871	0.0958385	0.125378	0.125914	0.00598253	0.121156	0.00759348		0.162522	0.181981	0.162001	0.186377	0.197995	0.221013	0.158427	0.146259	0.150541	0.165106	0.118511	0.185873	0.105083	0.191536	0.0840248	0.199036	0.18651	0.139276	0.119069	0.153121	0.125482
	18	0.120282	0.143481	0.103737	0.119087	0.132098	0.103668	0.0973822	0.144789	0.121336	0.109517	0.101824	0.155051	0.0909594	0.129144	0.102507	0.163325	0.0953766	0.0923182	0.080936	0.135974	0.0901534	0.126754	0.120651	0.00571777	0.113372	0.00729332		0.158343	0.176238	0.164556	0.176962	0.184258	0.21257	0.145639	0.150072	0.14919	0.161938	0.108715	0.171159	0.108417	0.178123	0.0829841	0.185565	0.180405	0.136534	0.108305	0.149689	0.10594
	18.25	0.122501	0.131792	0.100499	0.108671	0.126436	0.0957032	0.0963877	0.139525	0.117092	0.102547	0.103075	0.156438	0.0932402	0.129312	0.0973455	0.167058	0.0965829	0.0876865	0.0783493	0.133619	0.0886568	0.125325	0.115401	0.00532622	0.112249	0.00767605		0.150805	0.161393	0.154442	0.167687	0.182324	0.210372	0.155295	0.135966	0.139149	0.156439	0.0998783	0.164125	0.0967059	0.169107	0.0768579	0.185686	0.179789	0.124774	0.108266	0.145132	0.111705
	18.5	0.119404	0.130217	0.0948362	0.100682	0.117278	0.0945245	0.0929709	0.140512	0.113441	0.0965038	0.108949	0.149499	0.0921797	0.123369	0.0987797	0.141449	0.0906097	0.0920498	0.0754208	0.12591	0.081432	0.113726	0.111541	0.00567383	0.106914	0.00630824		0.146728	0.15578	0.142053	0.15661	0.163027	0.190498	0.13115	0.129973	0.139004	0.138575	0.102421	0.160435	0.0958318	0.176696	0.0772284	0.184497	0.187743	0.132533	0.0993439	0.144745	0.100309
	18.75	0.112986	0.122296	0.0889185	0.0966701	0.108633	0.0880534	0.0974578	0.129543	0.104254	0.100764	0.0935435	0.141368	0.0792128	0.126136	0.0918824	0.134076	0.0959438	0.0857965	0.0750241	0.119593	0.0839589	0.112134	0.105423	0.00478637	0.103033	0.00599497		0.138627	0.149558	0.129225	0.150166	0.15957	0.177744	0.132167	0.126535	0.132585	0.135994	0.0967793	0.1471	0.0989708	0.167807	0.0736248	0.166712	0.179267	0.121541	0.0976526	0.146764	0.0980102
	19	0.109734	0.119857	0.0844802	0.0917765	0.111355	0.0840079	0.0792713	0.126507	0.104086	0.100941	0.0850066	0.135728	0.0843513	0.117808	0.0923455	0.144211	0.089961	0.0757953	0.0728258	0.1049	0.0794658	0.111677	0.101231	0.00567354	0.0996167	0.00624426		0.131285	0.140423	0.128198	0.14865	0.151283	0.177192	0.126162	0.112232	0.126455	0.129423	0.0908817	0.144083	0.103531	0.174197	0.0707513	0.166375	0.17322	0.12364	0.0902458	0.129086	0.0942803
	19.25	0.100263	0.116636	0.0819041	0.0868663	0.103865	0.0812287	0.0713366	0.118558	0.112888	0.0860378	0.0806298	0.13632	0.079568	0.111311	0.0859426	0.134829	0.0758623	0.0807126	0.0664327	0.111755	0.0729663	0.104642	0.0970606	0.00577159	0.0943853	0.00640888		0.131582	0.134111	0.117571	0.134279	0.135911	0.166395	0.110773	0.112989	0.11452	0.125286	0.0907109	0.147589	0.0881198	0.151974	0.0671397	0.165813	0.160443	0.116618	0.0972737	0.130399	0.0955354
	19.5	0.10022	0.107006	0.0769917	0.0853251	0.0964541	0.0764126	0.0736103	0.11684	0.0930478	0.0807436	0.0862869	0.134692	0.0778822	0.108326	0.0832414	0.136075	0.0859315	0.0815175	0.0632025	0.113409	0.0780744	0.0980984	0.0917675	0.00497378	0.0944216	0.0062308		0.117944	0.130645	0.110965	0.130969	0.135059	0.153269	0.112832	0.102279	0.112557	0.121662	0.0848341	0.142804	0.0949231	0.151576	0.0663116	0.163445	0.15598	0.115689	0.0905269	0.131663	0.090748
	19.75	0.0987849	0.105436	0.0762171	0.0781246	0.0897578	0.0745526	0.0710438	0.108913	0.089997	0.0857606	0.0762451	0.120684	0.073091	0.104012	0.0804298	0.13081	0.075249	0.0752228	0.0617621	0.103329	0.0699519	0.0983771	0.0880919	0.00466875	0.0888403	0.00580317		0.120275	0.125443	0.109074	0.127553	0.123397	0.161345	0.0978261	0.0950844	0.103871	0.110606	0.0811052	0.142	0.0906886	0.143004	0.0608782	0.160184	0.158127	0.108644	0.0801722	0.11782	0.087374
	20	0.0931901	0.102567	0.0726222	0.0767869	0.0896763	0.0748009	0.0673315	0.109251	0.087422	0.0734103	0.0736698	0.123189	0.0693114	0.105056	0.0768808	0.133095	0.0750793	0.0665033	0.0597127	0.094866	0.0700771	0.0956004	0.0859609	0.00474352	0.0858808	0.00633003		0.114736	0.11581	0.10141	0.125677	0.119932	0.153121	0.0973496	0.0946443	0.0975555	0.101164	0.0757579	0.132202	0.0812627	0.142637	0.0599078	0.151996	0.15323	0.1029	0.0733359	0.115545	0.0820115
	20.25	0.0936573	0.0983749	0.0705982	0.0736297	0.0831993	0.0686115	0.0615376	0.101302	0.0921055	0.0797297	0.0711169	0.124017	0.0652847	0.0913844	0.074671	0.1238	0.0695162	0.0722013	0.0582527	0.108724	0.0658766	0.0896074	0.0825574	0.00482384	0.0841679	0.00612067		0.111185	0.119544	0.0920641	0.121403	0.117312	0.139921	0.0879194	0.0963164	0.0958225	0.103544	0.0770208	0.123625	0.0842215	0.13511	0.0562899	0.141033	0.149085	0.102501	0.0833257	0.106497	0.0727585
	20.5	0.0875934	0.0942667	0.0645562	0.0716331	0.0834705	0.0679642	0.0606239	0.101637	0.0833233	0.0786225	0.0673142	0.117472	0.0651486	0.10454	0.0700232	0.123262	0.0685635	0.074415	0.0565374	0.0976553	0.0636816	0.0902859	0.079452	0.00468233	0.0828862	0.00601752		0.107955	0.109932	0.0932484	0.110043	0.113358	0.129129	0.0900053	0.0848887	0.0912449	0.100698	0.0744887	0.129383	0.0764839	0.129181	0.0561266	0.144418	0.134982	0.0955112	0.0752259	0.107944	0.0725938
	20.75	0.0844241	0.0919586	0.0684208	0.0683845	0.0823415	0.0646097	0.0590184	0.093551	0.0845536	0.0770574	0.0684869	0.117937	0.0616717	0.0991891	0.0706788	0.114822	0.0664023	0.0688343	0.053005	0.0951232	0.0639545	0.0883173	0.0774736	0.00418508	0.0804215	0.00575981		0.0950861	0.102555	0.0857713	0.106957	0.10912	0.126803	0.0864826	0.0805607	0.0860838	0.0958423	0.0702125	0.1227	0.0796966	0.129346	0.0550666	0.139976	0.14103	0.0950229	0.0686922	0.101894	0.0744246
	21	0.0815724	0.0927692	0.0653927	0.0675457	0.0807874	0.0622754	0.0543965	0.0878985	0.0737093	0.0683207	0.065311	0.106015	0.0580914	0.0926103	0.0661998	0.102212	0.0617807	0.0610109	0.0506681	0.0879126	0.0596581	0.0843052	0.0740386	0.00422696	0.0741613	0.00503605		0.0956598	0.0969647	0.0774656	0.106024	0.0996492	0.121714	0.0842211	0.0832828	0.0815648	0.0931675	0.0680875	0.115817	0.0759067	0.131324	0.0540416	0.137143	0.135148	0.0928889	0.0656814	0.091757	0.0691898
	21.25	0.0799725	0.089391	0.0588498	0.0623675	0.0707657	0.0611164	0.0563781	0.0883256	0.0759996	0.0678204	0.0648553	0.110168	0.0573234	0.09148	0.0664384	0.108083	0.0649185	0.0609708	0.0481698	0.0928207	0.0588648	0.0818769	0.0714629	0.00420923	0.0749069	0.00553917		0.0944334	0.0978774	0.0728736	0.107292	0.102769	0.118601	0.0770346	0.0793681	0.0858233	0.0956888	0.0674854	0.119323	0.0716326	0.127382	0.0513256	0.135663	0.124964	0.0912697	0.0657178	0.0920519	0.067147
	21.5	0.0792652	0.0858256	0.0621179	0.0614381	0.0760508	0.0595093	0.0519433	0.0890662	0.0725105	0.0697796	0.0609173	0.104412	0.0557105	0.0884475	0.063626	0.102028	0.0590483	0.0528012	0.0474513	0.0811223	0.0561617	0.0747432	0.0708586	0.00426163	0.0704807	0.0051494		0.0946067	0.0924311	0.0680178	0.102514	0.0996571	0.110808	0.073194	0.0768533	0.0790598	0.088901	0.0646208	0.106271	0.0729255	0.122965	0.05179	0.132652	0.124075	0.086297	0.0612584	0.0924334	0.0622298
	21.75	0.0772059	0.0897546	0.0583209	0.0613401	0.0696035	0.0578082	0.0488539	0.0877303	0.0833702	0.0630217	0.0591216	0.0964566	0.0541793	0.0860721	0.0606332	0.0962599	0.0572658	0.0538914	0.0472524	0.0839808	0.0513805	0.0725873	0.0704431	0.0049172	0.0678541	0.00479114		0.091182	0.0893715	0.0707104	0.100231	0.0924672	0.10863	0.0763239	0.068673	0.0737876	0.0813981	0.0601585	0.106754	0.0659482	0.122307	0.0480235	0.120891	0.119359	0.0815137	0.0576808	0.0797984	0.0625023
	22	0.0770181	0.0841493	0.0572778	0.0564748	0.0641043	0.0528416	0.0523694	0.0781277	0.0748667	0.0605733	0.0551032	0.0932857	0.0506148	0.0851733	0.0569666	0.104463	0.0530989	0.059534	0.0486798	0.0841876	0.0509094	0.0752559	0.0663589	0.00409042	0.0675266	0.00517648		0.0883535	0.0852284	0.0684601	0.0908443	0.088697	0.101043	0.0644954	0.0661682	0.0734072	0.0863057	0.0602862	0.106378	0.0651291	0.118525	0.0480895	0.112654	0.115179	0.0838449	0.0601547	0.0766113	0.0585318
	22.25	0.0749526	0.080739	0.0537512	0.05612	0.0634272	0.0569256	0.0480456	0.0806573	0.0698143	0.0572584	0.0508152	0.095837	0.0487855	0.082475	0.0578702	0.0911942	0.05278	0.052892	0.0433226	0.0821562	0.0492867	0.0712958	0.064937	0.00404072	0.0643053	0.00497286		0.0837124	0.0840453	0.0668914	0.0893241	0.0858031	0.100012	0.0726135	0.0674444	0.0721698	0.0792909	0.0604431	0.101576	0.0629299	0.115034	0.0450372	0.120694	0.117836	0.0789763	0.0550556	0.0757062	0.0542467
	22.5	0.0721925	0.0794394	0.0520479	0.053938	0.0623999	0.052916	0.0454303	0.0785491	0.061978	0.0609365	0.0523817	0.0916168	0.0497043	0.0789716	0.0543461	0.0928201	0.0536505	0.0501274	0.0417253	0.0743458	0.0481754	0.0745036	0.062099	0.00408772	0.0633312	0.00474818		0.0797519	0.0841403	0.0651966	0.0874714	0.0822794	0.102204	0.0677086	0.0623263	0.0668734	0.0769834	0.0554998	0.0958397	0.0569435	0.11203	0.0470787	0.115995	0.108697	0.0749501	0.0595754	0.0817872	0.0561994
	22.75	0.0698239	0.0742017	0.0527573	0.0539855	0.0616855	0.0502234	0.0436442	0.0718401	0.0643222	0.0534527	0.0471386	0.0913212	0.0462372	0.0843744	0.0559886	0.0928577	0.0465753	0.0496404	0.0426103	0.0753097	0.0486468	0.0673996	0.060276	0.00355697	0.0616579	0.00508945		0.0786041	0.0786847	0.0641634	0.089027	0.0740674	0.09537	0.0643243	0.0600617	0.0636128	0.0677029	0.0511247	0.0938346	0.0565437	0.10462	0.0434519	0.11903	0.123556	0.0736977	0.0546667	0.0746746	0.0533144
	23	0.0693793	0.0726714	0.0493708	0.0511899	0.0577393	0.0510169	0.043873	0.0721417	0.0643292	0.0582944	0.0510839	0.0878089	0.0435244	0.0736888	0.0550833	0.0884694	0.0502129	0.0442154	0.0388303	0.0698666	0.0452624	0.0655427	0.059079	0.00362006	0.0593756	0.00458715		0.0735638	0.0752455	0.05895	0.0848189	0.0770045	0.0920327	0.0650763	0.0621857	0.0627236	0.0750568	0.0512664	0.0912101	0.064726	0.101206	0.0397871	0.101505	0.110107	0.0715682	0.0524516	0.0710089	0.0537642
	23.25	0.0662537	0.0733234	0.0483271	0.0506203	0.0595428	0.0478842	0.0451378	0.0742901	0.0617346	0.0563244	0.0486087	0.0838828	0.0429534	0.0771259	0.0474907	0.0854604	0.0436753	0.0464014	0.039402	0.0750572	0.0459898	0.069192	0.0585682	0.00372214	0.0585818	0.00470904		0.0721626	0.0756612	0.0541776	0.0849419	0.0768632	0.0900272	0.0604876	0.0593588	0.0586622	0.0703191	0.0490288	0.0851607	0.0604482	0.10635	0.0413005	0.108117	0.106921	0.0662047	0.0505201	0.0699097	0.0500488
	23.5	0.0644336	0.0688611	0.0488956	0.0482974	0.0577004	0.0442367	0.0398436	0.0700409	0.0548361	0.0509717	0.044185	0.0793953	0.0393303	0.0727127	0.0485564	0.0907967	0.04761	0.0439916	0.036624	0.0662317	0.0443783	0.0672936	0.0552384	0.00361692	0.0563136	0.00473101		0.0696916	0.0713454	0.051032	0.080124	0.0690875	0.0839971	0.0624371	0.0545809	0.0583286	0.0694679	0.0462798	0.0909951	0.0591235	0.0975017	0.0421129	0.105428	0.101839	0.0661234	0.0543458	0.0645326	0.0529724
	23.75	0.064517	0.0679031	0.0472901	0.0479491	0.0543283	0.0456874	0.0385115	0.0701739	0.0538311	0.0463282	0.0430529	0.0765548	0.0399724	0.0713777	0.0477595	0.0815888	0.0453053	0.0419106	0.0375641	0.0691773	0.0429358	0.0621602	0.0544657	0.00364065	0.0542837	0.00430895		0.0712259	0.0718858	0.0517399	0.0747085	0.0727809	0.0784038	0.0545608	0.0548371	0.0559597	0.0619343	0.0473968	0.083315	0.054749	0.0870606	0.0389601	0.0972626	0.11079	0.0636666	0.0488423	0.0610094	0.0461298
	24	0.0633827	0.0657	0.0463496	0.047811	0.0545291	0.0457348	0.0381319	0.0670272	0.0585447	0.0525267	0.0461983	0.0703373	0.0369185	0.0686478	0.0479436	0.0825677	0.0468499	0.0441279	0.0355335	0.0650504	0.0432378	0.0665107	0.0541346	0.00340005	0.0543423	0.00406013		0.0672108	0.0701222	0.0469724	0.0799572	0.0685772	0.0782749	0.0527057	0.0513587	0.0550236	0.0702802	0.0448923	0.0821939	0.0560398	0.099549	0.0411957	0.0946646	0.102588	0.0631974	0.0511169	0.0649848	0.044607
	24.25	0.0606462	0.0668122	0.0424115	0.0459913	0.0564027	0.04532	0.0348566	0.0620145	0.0564914	0.0474094	0.0414416	0.0743013	0.0369574	0.0670844	0.0458168	0.0792879	0.0429057	0.038855	0.0328565	0.0657805	0.0402116	0.0577158	0.0523274	0.00353475	0.0515864	0.00427265		0.0665592	0.0686826	0.0488753	0.0749002	0.0648027	0.0816837	0.0525447	0.050745	0.0522133	0.0600032	0.0440991	0.0738234	0.0533697	0.0870779	0.0359882	0.0892208	0.102025	0.0603615	0.0411544	0.0634286	0.0414435
	24.5	0.0593432	0.0648714	0.0435188	0.0439227	0.0542292	0.0438953	0.0384847	0.062863	0.0532621	0.044105	0.0443686	0.0741676	0.0357774	0.0623477	0.0439693	0.0777938	0.0444187	0.0392863	0.0340799	0.0644447	0.0429473	0.0593024	0.0515989	0.00318032	0.0513084	0.00403209		0.0633276	0.0651546	0.0479295	0.0743741	0.0622177	0.0788584	0.0474739	0.0472356	0.0495258	0.0597154	0.0436377	0.0775354	0.0507021	0.0836901	0.0358797	0.0923679	0.0946051	0.0594353	0.0447943	0.0580964	0.0397983
	24.75	0.0575874	0.0639926	0.045024	0.045241	0.0500956	0.0409154	0.0354219	0.0613994	0.0489345	0.0460596	0.0394136	0.0690074	0.0333306	0.0617807	0.0442798	0.0731091	0.0379787	0.0369232	0.0323522	0.0606197	0.0393385	0.0542453	0.0498458	0.00317696	0.0483414	0.00384637		0.0620025	0.0667924	0.0494008	0.0711401	0.0634483	0.0746	0.0522182	0.0461491	0.0464305	0.0597578	0.0397226	0.0742037	0.0506155	0.0875303	0.0365589	0.0929662	0.0950491	0.0591382	0.046423	0.0546302	0.0386609
	25	0.0550515	0.0608978	0.0432787	0.0415068	0.051785	0.0406983	0.0372364	0.0589037	0.0482789	0.0445619	0.0350807	0.0686634	0.0330716	0.0624913	0.0411598	0.0812603	0.0387653	0.0386568	0.0316263	0.0580997	0.0398194	0.0550304	0.0486263	0.00283692	0.0483298	0.00427366		0.0586347	0.0625596	0.0430596	0.0697692	0.0631856	0.0738096	0.0508289	0.0468646	0.0434271	0.0517216	0.0398749	0.0724531	0.047407	0.0841212	0.0340789	0.0890735	0.0940881	0.0556895	0.0419724	0.0531491	0.0373107
	25.25	0.055647	0.0598865	0.0412333	0.0419311	0.0499293	0.0409836	0.0360552	0.0555488	0.0487131	0.0447821	0.0387232	0.0630434	0.0312181	0.0588603	0.0369389	0.0723964	0.0389619	0.0358068	0.0324459	0.0598296	0.0391137	0.059516	0.0477698	0.00272597	0.0470489	0.00379937		0.0580451	0.0653704	0.0427367	0.0709826	0.058712	0.0731406	0.0469403	0.0461716	0.0443581	0.0506584	0.039683	0.0721658	0.0494576	0.0883533	0.0338989	0.0825739	0.0925857	0.0562726	0.0396918	0.0539702	0.0359269
	25.5	0.054459	0.0564414	0.038837	0.0438239	0.0500372	0.0399739	0.0312379	0.0582407	0.0470125	0.0443245	0.0358373	0.0693198	0.0322698	0.0596924	0.0377768	0.0690419	0.0347622	0.0333232	0.0302089	0.0579528	0.035825	0.0535518	0.0466737	0.0030137	0.0456836	0.00397341		0.0594405	0.0601266	0.0427535	0.0699197	0.0559878	0.0661825	0.042866	0.0435809	0.0450738	0.0508672	0.0398525	0.0675209	0.0481127	0.0823661	0.0316218	0.078679	0.0859338	0.0527599	0.0398173	0.0511301	0.0353358
	25.75	0.0525531	0.0535845	0.0385041	0.0391303	0.0464993	0.0404239	0.0305599	0.0534541	0.0463823	0.0420103	0.033857	0.0653821	0.0311318	0.058232	0.0388879	0.0698228	0.0363846	0.0319971	0.0302573	0.0564865	0.0357406	0.054659	0.0445657	0.00266349	0.0449884	0.00387389		0.0562985	0.0591109	0.0421857	0.0652987	0.0581952	0.0700405	0.0432139	0.0436243	0.0426358	0.0490144	0.0360687	0.0664155	0.0519729	0.0830175	0.0326122	0.0748404	0.0890983	0.051865	0.0414746	0.0483138	0.0342799
	26	0.0506818	0.0565715	0.0384027	0.0411099	0.0462905	0.0377573	0.0323704	0.0519968	0.0467623	0.0434833	0.034245	0.0624353	0.0300845	0.0584287	0.0401195	0.0751764	0.0352615	0.0295767	0.0284244	0.0533976	0.0350304	0.0553165	0.0446603	0.00260739	0.0446908	0.00411514		0.0547461	0.0575373	0.0443426	0.0659759	0.0535198	0.0698996	0.0427757	0.0415715	0.0425601	0.0498516	0.0383921	0.0639837	0.0483457	0.0765851	0.0304695	0.0774741	0.0857688	0.0497096	0.0406906	0.0491455	0.0341808
	26.25	0.0503757	0.0562506	0.0361556	0.0400732	0.0472402	0.0375658	0.0299084	0.0541555	0.0379035	0.0378486	0.03685	0.0628301	0.027053	0.054928	0.0381817	0.0646456	0.0347468	0.0311648	0.0271459	0.0546578	0.0352035	0.0498239	0.0432921	0.00301373	0.0426985	0.00362288		0.0559034	0.0580478	0.0426859	0.0639373	0.0545842	0.0619132	0.0388286	0.0424304	0.037919	0.0496624	0.0370833	0.0638637	0.0466129	0.0808676	0.0306031	0.0748481	0.0831964	0.0516309	0.0366527	0.0472934	0.0355127
	26.5	0.0486765	0.0520695	0.0374399	0.0389898	0.0465765	0.0353814	0.0291131	0.0513591	0.0456718	0.0400026	0.0324106	0.059998	0.0279818	0.0527546	0.0387981	0.0643437	0.0342683	0.030291	0.0283166	0.0513403	0.0323667	0.0521024	0.0428086	0.00264008	0.0419211	0.00349695		0.0528283	0.0538389	0.040814	0.0637849	0.052196	0.0647358	0.0420057	0.0406452	0.0400237	0.0487838	0.0348515	0.0624243	0.0435208	0.0737651	0.0303967	0.0770883	0.0810317	0.0501675	0.0374765	0.041853	0.0312995
	26.75	0.0486259	0.0521975	0.0354405	0.0381912	0.0427276	0.0349744	0.0287037	0.0482614	0.0384828	0.0354816	0.0351222	0.0586097	0.0282239	0.0515565	0.034213	0.0678499	0.0304622	0.0292688	0.0271194	0.053102	0.0359481	0.0494793	0.040845	0.0025595	0.0412644	0.00366992		0.0536735	0.0562435	0.0396039	0.0632403	0.0504826	0.0607624	0.0390909	0.0413694	0.0377809	0.0456606	0.0357147	0.0556051	0.0481437	0.0723114	0.0297397	0.0746013	0.0826302	0.049848	0.0376674	0.0445823	0.0296752
	27	0.0473464	0.0508044	0.0351981	0.0368857	0.0410434	0.0341709	0.0302313	0.0474044	0.0404878	0.0395011	0.0317365	0.0555164	0.025751	0.0547069	0.0345934	0.064257	0.0305765	0.0286133	0.0266248	0.0463349	0.0332006	0.0507801	0.0403969	0.0023202	0.0401687	0.00353174		0.0515321	0.0532075	0.0402597	0.0586266	0.048716	0.0637106	0.0377772	0.0381988	0.0371126	0.0453431	0.0328621	0.0564448	0.0462206	0.0700788	0.0298009	0.0711405	0.0795305	0.0464256	0.0302746	0.0399479	0.0306756
	27.25	0.046958	0.0494811	0.036205	0.036872	0.0425846	0.0349373	0.0290553	0.0467966	0.0411012	0.0374319	0.031792	0.0566579	0.0270038	0.0478572	0.0357933	0.0579132	0.0304479	0.0268703	0.0267032	0.0509655	0.0313706	0.0491411	0.0404435	0.00223677	0.0392268	0.00323403		0.0486476	0.0514322	0.0359577	0.0621797	0.0506894	0.0643707	0.0379427	0.0369286	0.0369845	0.0465842	0.0342015	0.0570936	0.0441693	0.0744617	0.0273027	0.0721802	0.0769602	0.041845	0.0342839	0.0438123	0.0288182
	27.5	0.0469892	0.0475095	0.0342831	0.0356235	0.0427659	0.0349712	0.0290807	0.0453853	0.0361916	0.0366562	0.0303405	0.0550977	0.0245644	0.0500262	0.0339702	0.0587216	0.0295036	0.026987	0.0254274	0.0527857	0.0311254	0.0485505	0.0392	0.0021953	0.0387505	0.00343902		0.0488201	0.0524204	0.0388031	0.0592689	0.0487269	0.0623188	0.0369878	0.0371024	0.0361471	0.0438404	0.0314972	0.0531203	0.0434505	0.0725253	0.0276352	0.0663267	0.0715397	0.0452157	0.0339857	0.04036	0.0317531
	27.75	0.0449388	0.0472279	0.0354079	0.036466	0.0393057	0.0334811	0.027672	0.0468458	0.0380042	0.0322881	0.030569	0.0526128	0.023204	0.0484833	0.0329689	0.0569987	0.0287845	0.0256595	0.0253179	0.0481846	0.0298391	0.0459576	0.0388166	0.00218395	0.0369898	0.0032373		0.0475143	0.0499036	0.0368023	0.0586182	0.0499906	0.0566805	0.0361441	0.0352158	0.0359595	0.0426029	0.032007	0.056378	0.0420446	0.0661843	0.0258827	0.0651878	0.0740295	0.0436406	0.0326057	0.0452913	0.0279429
	28	0.0428353	0.0471698	0.0328125	0.0352947	0.0395993	0.0322975	0.0287369	0.0435358	0.0371754	0.0374582	0.0293337	0.0514516	0.0241673	0.0503611	0.03445	0.0573747	0.0291794	0.025048	0.0253207	0.0461645	0.0300855	0.043249	0.0377175	0.00201791	0.0372034	0.0031454		0.0466997	0.0507205	0.033965	0.0583028	0.0468682	0.0581215	0.0354577	0.0343454	0.0350173	0.0380745	0.0303613	0.053301	0.0416531	0.0713117	0.0259767	0.0610356	0.0724184	0.0441432	0.0337472	0.0357238	0.0277577
	28.25	0.0412407	0.0446324	0.0322724	0.0332901	0.0376628	0.0323307	0.0269195	0.0433237	0.0337402	0.0338242	0.030277	0.0533716	0.0226769	0.0510614	0.03265	0.0530511	0.0266127	0.0260138	0.0239719	0.0453344	0.0298404	0.0428613	0.0361569	0.00197353	0.0362728	0.00315139		0.0471743	0.0492337	0.0333283	0.0580797	0.0452996	0.0579175	0.034555	0.0365329	0.0313989	0.0410533	0.0291455	0.0513782	0.0416458	0.0644401	0.026336	0.065804	0.068587	0.0418522	0.0331521	0.0401026	0.0279897
	28.5	0.0416422	0.0453113	0.0295106	0.0328133	0.0374664	0.0301964	0.0259248	0.0408661	0.0347295	0.0329538	0.0287838	0.0521299	0.0231207	0.047221	0.032466	0.0557706	0.0285293	0.0267389	0.0231852	0.0468435	0.0279839	0.0427459	0.0353845	0.00214096	0.0360364	0.00315193		0.0476788	0.0478814	0.0328231	0.0593729	0.0451135	0.0523963	0.0348589	0.0332434	0.0335556	0.0436824	0.0274844	0.0500467	0.0402855	0.0646599	0.026712	0.06398	0.0695884	0.0404371	0.0337731	0.0346225	0.0234901
	28.75	0.0425676	0.0471679	0.0350234	0.0316519	0.0359813	0.0310313	0.0260654	0.0422094	0.0329219	0.0359969	0.0294288	0.0476731	0.0220272	0.0451729	0.0325119	0.0541819	0.0236692	0.0244019	0.0223927	0.0458467	0.0285149	0.0402724	0.0360689	0.00223324	0.0347762	0.00302242		0.04759	0.0465071	0.0300363	0.0557174	0.0421283	0.0529657	0.0339673	0.0346043	0.0308235	0.0385113	0.0280772	0.049197	0.0448527	0.0635559	0.0237464	0.0620125	0.0661615	0.0407679	0.0304728	0.0379376	0.023506
	29	0.0400349	0.0440694	0.0308646	0.0319306	0.0351004	0.0289809	0.0244984	0.0391122	0.0304132	0.0318568	0.0270493	0.049137	0.0224128	0.0462914	0.0295677	0.0531407	0.0271014	0.0248145	0.0231488	0.044183	0.0268336	0.0409395	0.0338894	0.0020666	0.0343443	0.00300082		0.0456182	0.047906	0.0311176	0.053188	0.0420229	0.0518684	0.0344135	0.0337448	0.032506	0.0402199	0.0279677	0.0471647	0.0425876	0.0656861	0.0250405	0.0625962	0.0687749	0.0409661	0.0304134	0.0371028	0.023593
	29.25	0.0407996	0.0416289	0.0296186	0.0300816	0.0350497	0.0272674	0.025834	0.0398911	0.0320813	0.0369427	0.0299598	0.047417	0.0217024	0.0424793	0.0317649	0.0465294	0.0263683	0.0226327	0.0219429	0.0429514	0.0274002	0.0393278	0.0335836	0.00200321	0.0336476	0.00262312		0.0434791	0.0445944	0.0307849	0.0538954	0.0418724	0.0516196	0.033567	0.0334443	0.0296736	0.0390951	0.0279715	0.0499145	0.038872	0.0615426	0.0241744	0.0588683	0.0657187	0.0402652	0.0301595	0.0340804	0.0249275
	29.5	0.0407655	0.0405624	0.0287483	0.0315172	0.0357389	0.0273597	0.0236682	0.0384274	0.0301327	0.030278	0.0269016	0.0486008	0.0214034	0.0425043	0.0279921	0.0549138	0.025608	0.0213796	0.0223067	0.0456449	0.0255557	0.0373782	0.0329911	0.0020475	0.0331129	0.00315865		0.0441938	0.0428433	0.0291204	0.0524331	0.0388606	0.0527815	0.0313519	0.0320252	0.0284747	0.0402807	0.0261723	0.0480214	0.0376844	0.0638348	0.0239241	0.0561505	0.0659607	0.038281	0.0304472	0.0347012	0.0238609
	29.75	0.0383009	0.0409832	0.0307146	0.0299038	0.0335714	0.0285678	0.0238705	0.0383405	0.0321584	0.0323511	0.026201	0.0484534	0.0216101	0.0422708	0.0286502	0.0491285	0.023597	0.0227059	0.0217159	0.0443034	0.0255452	0.0358597	0.0329346	0.00182251	0.0324917	0.00287569		0.0436715	0.0441144	0.0308026	0.0498078	0.0385394	0.0464798	0.0322921	0.0307192	0.0285274	0.0379163	0.0258374	0.0484784	0.0396877	0.0605424	0.0230254	0.0593796	0.0680415	0.0395834	0.0322145	0.0346172	0.022368
	30	0.0375551	0.039954	0.0295976	0.0293068	0.033737	0.0277785	0.0235622	0.0342237	0.0287927	0.0317758	0.0254152	0.0452617	0.0227975	0.0444489	0.028727	0.0499475	0.0243295	0.0229193	0.0205028	0.044217	0.026618	0.0361015	0.0316119	0.00172023	0.0325432	0.00283799		0.0420176	0.0411196	0.029388	0.0513953	0.0395382	0.0461895	0.0302585	0.0300118	0.0280064	0.0365909	0.0263992	0.0494096	0.0374929	0.0591888	0.024487	0.058837	0.0611557	0.0378999	0.0291491	0.0340433	0.0225024
	30.25	0.0350631	0.0394207	0.0292525	0.029645	0.0323488	0.0270386	0.0228575	0.0377228	0.0313179	0.0312711	0.0267265	0.0454214	0.0198143	0.0426023	0.0278865	0.0442317	0.0239163	0.0233246	0.0213031	0.0406896	0.0254875	0.0372481	0.0316297	0.00173944	0.0315325	0.00257399		0.0424664	0.0418386	0.0293863	0.0496579	0.0373159	0.047325	0.0289862	0.0286321	0.0277004	0.0364261	0.0261164	0.0439483	0.0383481	0.0598605	0.0229911	0.0605246	0.0611544	0.0368069	0.0299487	0.0322998	0.0211993
	30.5	0.0354655	0.0378683	0.0283494	0.0285856	0.03136	0.0272567	0.0216382	0.0348812	0.031436	0.0314643	0.0249762	0.0454553	0.0201429	0.0404457	0.0264777	0.0506996	0.0244754	0.0218895	0.0202909	0.0407254	0.0243904	0.0347889	0.0307601	0.00165198	0.0312479	0.00283427		0.0406932	0.0404615	0.0291417	0.0503394	0.0373166	0.0505787	0.0306314	0.0291068	0.0273862	0.035991	0.0250435	0.0410094	0.0363281	0.0589462	0.0206605	0.0549768	0.0605161	0.0373171	0.031297	0.0309035	0.0195319
	30.75	0.035213	0.0371955	0.0266478	0.0279456	0.0310944	0.0260179	0.0227162	0.0341368	0.0292453	0.0294511	0.0243902	0.0444505	0.0198492	0.0408535	0.0294937	0.0435218	0.0253087	0.0196896	0.0211969	0.0406797	0.0241751	0.0345362	0.0300236	0.00159076	0.0305843	0.00255007		0.0425207	0.0404318	0.0269077	0.0477155	0.0374415	0.0442376	0.0302424	0.0284904	0.0273133	0.0318593	0.0251551	0.0436256	0.0374805	0.0552033	0.0217678	0.0523281	0.0593201	0.0369133	0.0272734	0.0310371	0.0199544
	31	0.0345897	0.0365233	0.0252148	0.0261839	0.0292963	0.0254032	0.0212476	0.0335035	0.0286199	0.0295	0.0253957	0.0427236	0.0198979	0.0361811	0.0272171	0.0445823	0.0228355	0.0212711	0.0208328	0.0430948	0.0248743	0.0342585	0.0289536	0.00168174	0.030205	0.00249472		0.0399147	0.0397194	0.0274799	0.0477227	0.0357413	0.0448234	0.0299403	0.0261756	0.026113	0.0360799	0.0254318	0.0409086	0.0359374	0.0555182	0.0203926	0.053261	0.0580591	0.0357929	0.0261936	0.0322993	0.0211273
	31.25	0.0338841	0.0338034	0.0267181	0.0270337	0.02839	0.0261972	0.0179899	0.0317526	0.0259958	0.0277352	0.0243861	0.0412512	0.0190889	0.0392905	0.0254945	0.042627	0.0240718	0.0184834	0.0202491	0.0402772	0.0238424	0.0323713	0.0279739	0.00163544	0.0291668	0.00246947		0.0387028	0.0393714	0.0271301	0.0476926	0.0358426	0.042121	0.0265985	0.0277147	0.0240009	0.0353193	0.0246052	0.03719	0.0391061	0.0555209	0.0209166	0.051955	0.0556043	0.0344786	0.0282221	0.0305538	0.0183761
	31.5	0.0328502	0.0347376	0.024748	0.0251136	0.0288438	0.0227654	0.0199301	0.033291	0.0260146	0.0300807	0.024544	0.0406071	0.0188607	0.0381215	0.0255811	0.0455047	0.0224996	0.0204391	0.0197526	0.0402502	0.0225675	0.0317411	0.0275883	0.00171381	0.0292731	0.00253362		0.0382084	0.0384002	0.0237509	0.0449522	0.034619	0.0442008	0.030876	0.0271234	0.0255274	0.0322754	0.0235199	0.0358674	0.0399959	0.0531419	0.0208886	0.0566243	0.0538557	0.0343596	0.0269106	0.0307431	0.0199372
	31.75	0.033543	0.033113	0.0261693	0.0259548	0.0274387	0.023782	0.0193141	0.0323017	0.0238028	0.0289879	0.0234351	0.0392095	0.0190923	0.0371568	0.0255859	0.0459151	0.0226258	0.0204719	0.0179307	0.0408175	0.0228657	0.0322804	0.0272688	0.00162132	0.0289519	0.00255902		0.0398191	0.03712	0.0272764	0.044437	0.032529	0.0430471	0.027319	0.0253985	0.0234346	0.0339649	0.0228525	0.0395197	0.0342249	0.0541781	0.0204558	0.0517866	0.0582202	0.0327318	0.0268198	0.0308106	0.0188799
	32	0.0321611	0.0341324	0.0243228	0.0251623	0.0270453	0.0225843	0.0187992	0.0309998	0.0240046	0.0281009	0.0238288	0.0390247	0.0183535	0.0377909	0.0256886	0.0428094	0.0215762	0.0202011	0.0195922	0.0406462	0.0233332	0.0309126	0.0265791	0.00165908	0.0286045	0.00241622		0.038501	0.0370567	0.0252973	0.0440699	0.0344363	0.0416696	0.0274498	0.0247893	0.0236982	0.0340564	0.0231031	0.0382449	0.0364182	0.0513928	0.0207882	0.0539845	0.0536983	0.0321371	0.0287772	0.0306174	0.019213
	32.25	0.0313629	0.0333234	0.0254714	0.026182	0.0282755	0.0227157	0.019221	0.0302362	0.0249135	0.0291379	0.0222713	0.0389819	0.0172656	0.0356965	0.0259901	0.0393724	0.0219122	0.0184856	0.0190849	0.0377886	0.0219749	0.0307673	0.0268557	0.00147742	0.0275946	0.0022748		0.0359784	0.0373463	0.0269805	0.0428249	0.0331093	0.0420403	0.0268879	0.0261376	0.0234276	0.0328819	0.0227559	0.0350928	0.0360552	0.0515116	0.0198441	0.0498014	0.0539679	0.031448	0.0235244	0.028847	0.016844
	32.5	0.0302492	0.0353159	0.0245516	0.0245841	0.0267087	0.0224158	0.0180743	0.0310587	0.0239004	0.025819	0.0226617	0.0369609	0.0179023	0.0375238	0.0253426	0.045307	0.0205007	0.0185115	0.0192795	0.0385324	0.0216407	0.0303189	0.0263176	0.00172482	0.0277155	0.00252021		0.0376475	0.0376554	0.0234335	0.0406936	0.0309967	0.0403432	0.02887	0.0248825	0.0226148	0.031029	0.022303	0.0365776	0.0350459	0.0515328	0.0201447	0.0493451	0.0550719	0.0313348	0.0277181	0.0268344	0.0163755
	32.75	0.030685	0.0316193	0.0233394	0.0251561	0.0262178	0.0201893	0.0174651	0.0291975	0.0217305	0.0315839	0.0228351	0.0394593	0.0170715	0.0346875	0.0249209	0.0433846	0.0207146	0.0167234	0.017725	0.0375744	0.0216911	0.0299973	0.0250667	0.00161841	0.0275668	0.00253184		0.0366127	0.0351047	0.0244828	0.0423048	0.0310735	0.0371829	0.0276873	0.024117	0.0231074	0.0331482	0.0205831	0.0364729	0.038208	0.0495552	0.0182913	0.046775	0.0507114	0.0305312	0.029094	0.0265494	0.0168633
	33	0.0297275	0.0302335	0.0235476	0.0243892	0.0248019	0.0216018	0.0189837	0.0289268	0.0235136	0.0281731	0.021535	0.0375357	0.0171206	0.0363168	0.0249441	0.0415195	0.020364	0.0184935	0.018091	0.0390092	0.0204048	0.0293957	0.0250806	0.00127788	0.0271464	0.00244246		0.0352124	0.0340111	0.0250302	0.0401305	0.0281424	0.0395901	0.0262159	0.0225938	0.021637	0.0333517	0.0212457	0.033548	0.036921	0.0504776	0.0187016	0.0460566	0.0508801	0.0307131	0.0250109	0.0279054	0.0164357
	33.25	0.0284979	0.0308726	0.0239464	0.0222805	0.0246484	0.0196004	0.016993	0.0282009	0.0229901	0.0274953	0.0224753	0.0360944	0.0174941	0.0354244	0.0238842	0.0384281	0.0210326	0.0185443	0.0183949	0.0360911	0.0201428	0.0270471	0.0242256	0.00147905	0.0263499	0.00213398		0.0374757	0.0362179	0.0223765	0.0424476	0.0293142	0.0369533	0.0252545	0.0232308	0.0215826	0.0290624	0.021445	0.0333797	0.0346607	0.0488528	0.0180215	0.0476605	0.0510565	0.0300134	0.0255306	0.0294645	0.0160201
	33.5	0.0280742	0.029873	0.0224119	0.0227639	0.0255212	0.0200046	0.0169069	0.0264853	0.0234958	0.0280582	0.0254216	0.0370106	0.0167359	0.0352375	0.0231962	0.0412235	0.0196692	0.0178035	0.0179019	0.0352087	0.0211685	0.0276762	0.0239485	0.00134442	0.0266393	0.00228576		0.0339672	0.0351796	0.0217724	0.0420003	0.0306499	0.0398455	0.0246489	0.0224936	0.0213548	0.0298676	0.0208694	0.0351442	0.0367344	0.0448989	0.0179105	0.0482638	0.0486486	0.0310493	0.024242	0.0249928	0.017057
	33.75	0.0273211	0.0288303	0.0226168	0.0227945	0.0236417	0.0200111	0.0165315	0.0261737	0.0228768	0.025289	0.0208928	0.0354968	0.0153127	0.0351911	0.0225586	0.0404911	0.0204575	0.0183303	0.0180904	0.0371852	0.0208399	0.0277889	0.0234219	0.00125014	0.0259942	0.00232648		0.0344814	0.0321954	0.0225043	0.0397639	0.0283773	0.0372201	0.025973	0.0224034	0.0209994	0.0287678	0.0208003	0.0339324	0.0344719	0.0523409	0.0169847	0.0499224	0.0496494	0.0294868	0.026014	0.0258037	0.0150747
	34	0.0289616	0.0286706	0.0215227	0.0221548	0.0243451	0.0190119	0.0160698	0.0267928	0.022362	0.0252441	0.0214419	0.0352476	0.0161314	0.035442	0.0237274	0.0379623	0.0196882	0.0179833	0.0181058	0.0374314	0.0208316	0.0267315	0.0233212	0.00144433	0.0258437	0.00221548		0.0355257	0.0322268	0.0232735	0.0389144	0.0289113	0.0351986	0.0243523	0.0213665	0.0207741	0.0306705	0.01985	0.0328785	0.0360686	0.0470876	0.0178009	0.0467498	0.0464587	0.030131	0.0251727	0.0253545	0.0163163
	34.25	0.0266197	0.0295888	0.0210754	0.0206994	0.0246628	0.0187463	0.0159079	0.0255674	0.0215305	0.0239746	0.0192992	0.0322381	0.0158987	0.0346284	0.0222435	0.0334551	0.0183598	0.0164276	0.0173628	0.0372945	0.0182203	0.0261542	0.0227109	0.00141748	0.0242736	0.00213046		0.0337052	0.0311014	0.0222843	0.0376404	0.0276216	0.0364255	0.0246652	0.0212655	0.0201601	0.0310649	0.0195457	0.0334779	0.0333307	0.0496858	0.0173708	0.0462345	0.0498506	0.0303525	0.0216955	0.0237483	0.0153598
	34.5	0.0268282	0.0279267	0.0211312	0.0211735	0.0232177	0.0181008	0.0159754	0.0241396	0.022318	0.0244126	0.0203937	0.0342959	0.0146469	0.0328755	0.0233222	0.0350818	0.0174096	0.0172115	0.0170193	0.0356064	0.0179044	0.0258656	0.0223123	0.0012729	0.0243112	0.00214989		0.0328292	0.0313315	0.0210715	0.0372986	0.0274377	0.0385783	0.023173	0.0209117	0.0199073	0.029507	0.0193831	0.0324726	0.0365761	0.044417	0.0169983	0.0425449	0.0467622	0.0273832	0.0230959	0.0233662	0.0151101
	34.75	0.025642	0.0285421	0.0193339	0.0203369	0.0223634	0.0185415	0.0164905	0.024334	0.0195533	0.0233993	0.0195361	0.033174	0.014904	0.0340506	0.0238719	0.034887	0.0187319	0.0178924	0.0171153	0.0334369	0.0182101	0.0252759	0.0216819	0.00128511	0.0241912	0.00203011		0.0318261	0.0292324	0.0213849	0.0356704	0.0261771	0.0343634	0.0214744	0.0210614	0.0200249	0.0268509	0.0182437	0.0302699	0.032859	0.0423329	0.0174881	0.0416795	0.0517237	0.0268698	0.0230334	0.0234198	0.015523
	35	0.0252136	0.0267321	0.0198612	0.0203067	0.0215993	0.0179906	0.0152608	0.0237472	0.0185846	0.0247161	0.0203551	0.0324733	0.0160086	0.0321332	0.0225051	0.0349173	0.0180312	0.016248	0.0168194	0.0359393	0.0176617	0.0253804	0.0210329	0.00122539	0.0240914	0.0020706		0.0318571	0.0314301	0.019945	0.0388862	0.0269256	0.0346234	0.0227983	0.0200146	0.0189466	0.0304428	0.019371	0.0313304	0.0365628	0.0441458	0.0174975	0.0437302	0.0482704	0.026857	0.0208586	0.0240913	0.0154687
[truncated: 52 more columns]
