# Supplementary material for: Thalamic reticular control of local sleep in mouse sensory cortex
Source: eLife. 2018 Dec 25;7:e39111. doi: 10.7554/eLife.39111 (PMC6342525; doi:10.7554/eLife.39111)
Supplement: Figure 4—source data 1. [file elife-39111-fig4-data1.xlsx]

## Sheet: Figure4
Figure 4 - source Data and statistics underlying Figure 4
(B)	in vitro effect of CNO onto TRN neurons												(D)																		(E)
														Frequency (Hz)	S1- Mean PSD value during NREM sleep																	Subject	SO 0.5 - 1.5 Hz		Delta 1.5 - 4 Hz		Sigma 10 - 15 Hz
CELL	Cond	BL (mV)	CNO (mV)	deltaV	CNOhyperpol		Statistical analysis onto CNO-induced hyperpolarization								NaCl							CNO											NaCl	CNO	NaCl	CNO	NaCl	CNO
E180418	Dreadd+	-70.39	-78.31	7.92	-7.92										Di21	Di22	Di26	Di27	Di28	Mean	SEM	Di21	Di22	Di26	Di27	Di28	Mean	SEM				Di21	2.724	1.711	12.1293	13.9351	1.551	1.0441
H180418	Dreadd+	-63.23	-73.23	10	-10		Shapiro	p-value						0.25	0.430803	0.300887	0.341933	0.456907	0.546311	0.415368	0.0588991	0.352209	0.226869	0.282619	0.37576	0.355869	0.318665	0.0471884				Di22	2.3789	1.3206	13.0995	14.749	1.1599	0.9623
F180419	Dreadd+	-46.86	-60.59	13.73	-13.73		Dreadd+, BL	0.58						0.5	1.06277	0.721901	0.965247	1.05535	1.38333	1.03772	0.0921544	0.677546	0.47978	0.64564	0.954133	0.77273	0.705966	0.078989				Di26	3.192	2.3288	12.4104	13.589	1.1821	1.0637
B180420	Dreadd+	-72.06	-81.66	9.6	-9.6		Dreadd+, CNO	0.6						0.75	1.82129	1.46105	1.77651	2.08381	2.65559	1.95965	0.126532	1.09732	0.769227	1.21957	1.81201	1.39182	1.25799	0.117271				Di27	3.3461	3.0054	12.4986	14.5449	1.0918	0.7569
C180420	Dreadd+	-57.45	-75.26	17.81	-17.81		Dreadd-, BL	0.57						1	2.79061	2.26199	3.34191	3.48247	3.93139	3.16167	0.152156	1.67584	1.17705	2.29947	3.00796	2.05475	2.04302	0.156649				Di28	3.8146	2.1929	11.5644	14.5359	1.4529	0.9312
D180420	Dreadd+	-56.14	-78.66	22.52	-22.52		Dreadd-, CNO	0.97						1.25	3.64448	3.29852	4.53716	5.04665	5.2783	4.36102	0.1758	2.28616	1.82288	3.19933	4.23429	2.87694	2.88392	0.1817				Mean	3.09112	2.11174	12.3404	14.2708	1.28754	0.95164
E180420	Dreadd+	-57.33	-74.9	17.57	-17.57									1.5	4.21631	4.26624	5.25962	4.48727	5.40271	4.72643	0.142007	2.89144	2.54698	4.5478	4.98033	4.12353	3.81802	0.194268				SEM	0.141156	0.151328	0.141503	0.132101	0.0849154	0.0660737
D180907	Dreadd+	-45.98	-62.5	16.52	-16.52		ANOVA2F with repetition	p-value						1.75	5.91997	4.71344	6.06711	5.05408	5.45152	5.44122	0.142831	4.02444	3.5913	5.2189	5.88143	5.10638	4.76449	0.182873				Anova	Bands		F	1508.86	p	5.98611e-19
A180910	Dreadd+	-54	-67	13	-13		Drug	0.00381						2	5.61095	5.08362	5.20083	5.23113	4.9648	5.21826	0.0933244	4.33379	4.51277	5.68132	5.96803	6.24751	5.34869	0.176474					Inj. Type:bands		F	19.9311	p	4.52916e-05
C180910	Dreadd+	-59.5	-69.5	10	-10		Cond	0.51						2.25	5.03914	5.3657	5.54188	5.07766	5.12489	5.22985	0.0878786	4.68355	5.45424	6.4684	6.70719	6.4459	5.95186	0.1751				Paired t	4.7752		-6.5157		4.163
E180419	Dreadd-	-56.56	-56.76	0.2	-0.2		Drug:Cond	0.074						2.5	4.82315	5.24586	5.23942	4.33574	4.74974	4.87878	0.116692	5.41574	6.38002	5.88009	5.9817	6.65862	6.06323	0.130785				p value	0.0088		0.0029		0.0141
a200418	Dreadd-	-53.62	-51.39	-2.23	2.23									2.75	4.73943	6.03153	5.13101	5.09062	4.73207	5.14493	0.137717	5.74223	6.55406	5.39485	5.64705	6.57896	5.98343	0.139928
b200418	Dreadd-	-52.84	-55.15	2.31	-2.31		Student t-test	p-value						3	4.98369	7.01859	5.00731	5.81861	4.35363	5.43637	0.191594	6.68319	8.2565	5.29205	6.03312	6.79246	6.61146	0.198169
c200418	Dreadd-	-59.71	-59.59	-0.12	0.12		Dreadd+, BL vs CNO	5.9e-06						3.25	4.3269	5.58793	4.73951	5.84235	4.20625	4.94059	0.162677	7.34551	7.70733	5.26054	6.14245	6.06721	6.50461	0.18943
							Dreadd-, BL vs CNO	0.97						3.5	4.73017	4.95297	4.48116	5.46644	4.40496	4.80714	0.123623	7.46947	7.18755	5.12374	6.44545	5.37728	6.3207	0.193813
														3.75	4.33169	4.34191	3.78627	4.01669	3.96279	4.08787	0.0931877	6.15754	5.638	5.33408	4.9688	4.71164	5.36201	0.142468
	Cond	BL (mV)	CNO (mV)	deltaV	CNOhyperpol									4	3.80762	3.84686	3.63474	3.63498	3.21161	3.62716	0.0949158	4.87809	4.88166	4.85593	3.82836	4.19181	4.52717	0.132311
Mean	Dreadd+	-58.294	-72.161	13.867	-13.867									4.25	3.03889	3.67574	3.03797	3.15355	3.07845	3.19692	0.0986045	4.28906	4.40053	3.54955	2.95062	3.45086	3.72812	0.147522
	Dreadd-	-55.6825	-55.7225	0.04	-0.04									4.5	2.7677	2.96471	2.60781	2.83603	2.42023	2.7193	0.0868832	3.00359	3.40594	2.61255	2.42509	2.83747	2.85693	0.116188
SEM	Dreadd+	2.72585	2.23474	1.47356	1.47356									4.75	2.48059	2.51859	2.53653	2.42592	2.18491	2.42931	0.0715365	2.64581	2.60142	2.49172	2.21818	2.1599	2.42341	0.0891479
	Dreadd-	1.56324	1.71105	0.929023	0.929023									5	2.14492	2.22573	2.09065	2.19752	1.92963	2.11769	0.0647372	2.15026	2.10631	1.92317	1.69542	1.84788	1.94461	0.0818638
														5.25	1.94497	1.69892	1.95755	1.82973	1.63816	1.81387	0.0716088	1.74282	1.69541	1.74373	1.48943	1.48186	1.63065	0.0691957
														5.5	1.58129	1.80687	1.5719	1.62566	1.43126	1.6034	0.0695235	1.60147	1.40006	1.57791	1.18783	1.41678	1.43681	0.0771591
														5.75	1.44827	1.55744	1.52103	1.32897	1.30291	1.43172	0.0636243	1.34346	1.15825	1.47231	1.15947	1.12494	1.25169	0.0733375
														6	1.2725	1.30927	1.28398	1.23485	1.19147	1.25841	0.0405805	1.17379	1.14713	1.18069	1.0049	1.01593	1.10449	0.0557501
														6.25	1.14824	1.15125	1.08765	1.11857	1.06998	1.11514	0.0359258	0.9788	1.02487	1.00975	0.865078	0.849335	0.945566	0.0543421
														6.5	1.11411	1.0109	1.09787	1.07042	0.961935	1.05105	0.0476404	0.932585	0.8524	0.95542	0.737331	0.81277	0.858101	0.0564318
														6.75	0.999147	0.863589	0.927336	0.836155	0.942767	0.913799	0.0481924	0.899835	0.810711	0.824908	0.750154	0.725064	0.802134	0.0495117
														7	0.955919	0.755359	0.865821	0.791365	0.852039	0.8441	0.0524745	0.856298	0.656199	0.81313	0.706579	0.65146	0.736734	0.0577668
														7.25	0.923082	0.737943	0.744925	0.746062	0.815876	0.793578	0.053177	0.818621	0.591451	0.733465	0.677035	0.63771	0.691656	0.0561363
														7.5	0.733805	0.645066	0.723445	0.704252	0.740786	0.709471	0.037136	0.679148	0.555825	0.67155	0.559514	0.579335	0.609075	0.0467989
														7.75	0.75257	0.604163	0.610561	0.605698	0.739622	0.662523	0.0523039	0.60371	0.487534	0.609186	0.47355	0.54661	0.544118	0.0475481
														8	0.688743	0.541595	0.584342	0.572162	0.714791	0.620327	0.0523208	0.550438	0.463835	0.538252	0.425913	0.533052	0.502298	0.044147
														8.25	0.59818	0.580773	0.55503	0.562714	0.610531	0.581446	0.0288841	0.518339	0.439145	0.507178	0.406307	0.494112	0.473016	0.0414938
														8.5	0.555679	0.519698	0.531132	0.438707	0.586664	0.526376	0.0444928	0.46804	0.439897	0.456469	0.387083	0.470613	0.444421	0.0350143
														8.75	0.529022	0.50154	0.445	0.461869	0.525342	0.492555	0.0367317	0.480624	0.423173	0.414021	0.339263	0.407616	0.41294	0.0424459
														9	0.533429	0.481399	0.441831	0.371682	0.514896	0.468647	0.0480222	0.408104	0.38571	0.406073	0.32814	0.407545	0.387114	0.0350148
														9.25	0.53104	0.425604	0.437415	0.399893	0.475173	0.453825	0.0427036	0.411908	0.374395	0.382153	0.27684	0.343773	0.357814	0.0428622
														9.5	0.511917	0.404477	0.390403	0.352972	0.454432	0.42284	0.046965	0.362708	0.360433	0.36765	0.26101	0.331588	0.336678	0.0399407
														9.75	0.491694	0.385271	0.368089	0.360736	0.439776	0.409113	0.044588	0.360576	0.341723	0.313998	0.22578	0.313784	0.311172	0.042997
														10	0.445642	0.339875	0.346874	0.348275	0.414493	0.379032	0.0414311	0.328932	0.33554	0.312987	0.230271	0.294013	0.300349	0.0389144
														10.25	0.437286	0.340637	0.330596	0.277435	0.409201	0.359031	0.0478961	0.319732	0.307023	0.274121	0.231793	0.277097	0.281953	0.0349387
														10.5	0.420505	0.338873	0.314917	0.291044	0.396187	0.352305	0.0441822	0.316567	0.287001	0.285424	0.232421	0.281624	0.280607	0.0329422
														10.75	0.408198	0.303657	0.312702	0.279702	0.371043	0.33506	0.0435049	0.306662	0.260146	0.285994	0.194846	0.267138	0.262957	0.0388314
														11	0.413606	0.307374	0.308302	0.264357	0.362398	0.331207	0.0454409	0.283041	0.26841	0.283053	0.199615	0.233867	0.253597	0.0360146
														11.25	0.410681	0.284669	0.279658	0.272065	0.327629	0.31494	0.0454432	0.270566	0.231774	0.265654	0.169082	0.231147	0.233644	0.0380724
														11.5	0.39318	0.256819	0.268073	0.238311	0.328117	0.2969	0.0476531	0.258316	0.22481	0.256989	0.175927	0.207992	0.224807	0.0352604
														11.75	0.365518	0.275207	0.249637	0.210756	0.338469	0.287918	0.0476853	0.231413	0.206568	0.241213	0.163275	0.210914	0.210677	0.0328212
														12	0.348099	0.250364	0.256011	0.243778	0.316372	0.282925	0.0408283	0.206527	0.201145	0.223978	0.174193	0.194808	0.20013	0.0254535
														12.25	0.339569	0.233692	0.242704	0.203364	0.306952	0.265256	0.0448073	0.221662	0.184887	0.207343	0.16056	0.182828	0.191456	0.029087
														12.5	0.309624	0.233348	0.245456	0.189161	0.294601	0.254438	0.0416954	0.176943	0.181695	0.202277	0.144621	0.182807	0.177668	0.0273199
														12.75	0.284239	0.222784	0.21187	0.208861	0.291795	0.24391	0.0381517	0.184004	0.18176	0.195049	0.141478	0.169512	0.174361	0.02708
														13	0.275258	0.191659	0.210224	0.224256	0.249471	0.230174	0.034292	0.18013	0.173882	0.196212	0.130715	0.160069	0.168202	0.0296969
														13.25	0.270035	0.185256	0.207888	0.190324	0.255556	0.221812	0.0372022	0.163276	0.154702	0.173119	0.123402	0.154744	0.153849	0.0258193
														13.5	0.224299	0.187567	0.192171	0.21578	0.249996	0.213963	0.0301438	0.169974	0.152302	0.174293	0.123204	0.147511	0.153457	0.0269925
														13.75	0.221995	0.170599	0.182435	0.173216	0.22733	0.195115	0.0313062	0.147895	0.128101	0.172149	0.116497	0.136397	0.140208	0.027559
														14	0.233284	0.154853	0.185505	0.182162	0.220171	0.195195	0.0335636	0.13436	0.126187	0.165643	0.104755	0.124428	0.131074	0.0281652
														14.25	0.189404	0.157511	0.167692	0.157618	0.20269	0.174983	0.0268972	0.136154	0.1261	0.147981	0.0978458	0.124793	0.126575	0.0257726
														14.5	0.188513	0.15754	0.161196	0.156022	0.188114	0.170277	0.02435	0.133438	0.123084	0.145999	0.092457	0.117487	0.122493	0.0267491
														14.75	0.167921	0.145703	0.156482	0.143749	0.184691	0.159709	0.024645	0.112654	0.108925	0.134963	0.0933555	0.118628	0.113705	0.0232566
														15	0.159625	0.143327	0.142485	0.141894	0.167052	0.150877	0.0204474	0.116951	0.105577	0.133887	0.0849289	0.108293	0.109927	0.0252483
														15.25	0.144846	0.128079	0.133608	0.13463	0.169029	0.142038	0.0241172	0.111674	0.0993264	0.12378	0.0834012	0.1089	0.105416	0.0232316
														15.5	0.130273	0.117508	0.125533	0.133187	0.157071	0.132714	0.0230508	0.102339	0.0955548	0.110285	0.0784168	0.103433	0.0980056	0.0208338
														15.75	0.12831	0.111459	0.114398	0.121197	0.147285	0.12453	0.0226103	0.0953596	0.0933523	0.114569	0.0752755	0.103284	0.096368	0.0227296
														16	0.126656	0.113042	0.12363	0.103641	0.143131	0.12202	0.0230893	0.0873133	0.0884596	0.109127	0.0722187	0.0946867	0.090361	0.0218547
														16.25	0.107231	0.0970839	0.104659	0.105423	0.130428	0.108965	0.0212392	0.0833556	0.0857989	0.100554	0.0661497	0.0944591	0.0860635	0.0216331
														16.5	0.108122	0.0910791	0.0962253	0.100895	0.127099	0.104684	0.0223894	0.083136	0.0798434	0.0930019	0.0664808	0.0923481	0.082962	0.019696
														16.75	0.100081	0.0896716	0.102209	0.0828399	0.115858	0.0981319	0.0212736	0.0782142	0.0740966	0.0877295	0.0638839	0.081917	0.0771682	0.0179038
														17	0.0911248	0.0828394	0.0860801	0.0848696	0.102837	0.0895503	0.0169511	0.0733224	0.0761132	0.0880403	0.0566792	0.080422	0.0749154	0.0203802
														17.25	0.0895849	0.087303	0.092984	0.0855322	0.0998655	0.0910539	0.0142286	0.0632287	0.0716059	0.08182	0.0599484	0.0758923	0.0704991	0.0179255
														17.5	0.0828566	0.0842804	0.0850687	0.0799261	0.0894152	0.0843094	0.011131	0.0669733	0.0662278	0.077961	0.0578934	0.0760194	0.069015	0.0170602
														17.75	0.0782605	0.0762031	0.079686	0.0680591	0.0867809	0.0777979	0.0155318	0.0618987	0.0618219	0.0823454	0.0481928	0.0668458	0.0642209	0.0209626
														18	0.0735121	0.0756585	0.0734789	0.0734276	0.0834006	0.0758956	0.0124047	0.064872	0.0626129	0.0722071	0.0477262	0.0660625	0.0626961	0.0180353
														18.25	0.0723715	0.0722533	0.0720292	0.0591646	0.0789395	0.0709516	0.0160546	0.0594231	0.0577479	0.0737529	0.0491222	0.0586633	0.0597419	0.0178087
														18.5	0.0691382	0.0694517	0.0697318	0.0650445	0.0715386	0.0689809	0.00924685	0.0519556	0.0532603	0.06601	0.0500668	0.0548916	0.0552369	0.0149852
														18.75	0.0671865	0.0641172	0.0702741	0.0625777	0.0729793	0.0674269	0.0123824	0.0541515	0.0553713	0.0664439	0.0443035	0.0553779	0.0551296	0.0167553
														19	0.0635139	0.0641654	0.0641752	0.0587995	0.0688159	0.063894	0.0112735	0.0497477	0.0528646	0.0627013	0.0417547	0.0494108	0.0512958	0.0164625
														19.25	0.063401	0.0605793	0.0631135	0.0554547	0.0661856	0.0617468	0.0120213	0.0484519	0.0501396	0.0619472	0.042294	0.0485306	0.0502727	0.0160296
														19.5	0.0599685	0.0584504	0.0600923	0.0500905	0.0625206	0.0582245	0.0130703	0.0458342	0.0503088	0.0588993	0.0368151	0.0486836	0.0481082	0.0168902
														19.75	0.0573935	0.0541548	0.0602578	0.0522191	0.0570469	0.0562144	0.0105448	0.0424349	0.0470368	0.0563032	0.0415685	0.0464669	0.0467621	0.0144671
														20	0.0533272	0.0532973	0.0559994	0.0487425	0.0591296	0.0540992	0.0117144	0.0424238	0.0433791	0.0528528	0.0379665	0.0423352	0.0437915	0.0140044
														20.25	0.0548069	0.0490088	0.0610142	0.0468021	0.0548558	0.0532976	0.0141375	0.0407596	0.044444	0.0511292	0.0344623	0.0418279	0.0425246	0.0147101
														20.5	0.0511424	0.0501556	0.0592746	0.0442278	0.050893	0.0511387	0.0138498	0.0409605	0.0375518	0.0493723	0.0356186	0.0400486	0.0407104	0.0137417
														20.75	0.0489236	0.0469278	0.0534219	0.0445272	0.0511908	0.0489983	0.0111707	0.0368406	0.0399343	0.0458999	0.0325142	0.0406827	0.0391743	0.0133037
														21	0.0494395	0.0488383	0.0535425	0.0457133	0.0483392	0.0491746	0.0100548	0.0376042	0.0381957	0.0424196	0.0324935	0.0400566	0.0381539	0.0114738
														21.25	0.0527233	0.0467115	0.0482548	0.0454717	0.0497056	0.0485733	0.0100352	0.0355887	0.0362843	0.0442515	0.0348799	0.0376374	0.0377284	0.0116385
														21.5	0.0455391	0.0434674	0.048787	0.0430909	0.0491542	0.0460077	0.0101222	0.0362974	0.0340459	0.0441422	0.0301289	0.0366337	0.0362496	0.0135313
														21.75	0.0467812	0.0417594	0.0501758	0.0426245	0.0475804	0.0457843	0.0112293	0.0327528	0.0347221	0.0445912	0.0314442	0.0344692	0.0355959	0.0136431
														22	0.0416819	0.0396392	0.0451562	0.0372321	0.0488396	0.0425098	0.0127986	0.0313699	0.0346873	0.0438355	0.0283358	0.0346196	0.0345696	0.0144161
														22.25	0.0456444	0.0381286	0.0431935	0.039783	0.0449388	0.0423377	0.0108101	0.0331996	0.0334338	0.041261	0.0300976	0.0348634	0.0345711	0.0121467
														22.5	0.0441297	0.0383932	0.0453847	0.037176	0.0459018	0.042197	0.0121142	0.0335916	0.032194	0.0386468	0.0282796	0.0350504	0.0335525	0.0116642
														22.75	0.0432876	0.0395998	0.0416971	0.0356451	0.0466181	0.0413695	0.0121112	0.030052	0.0307125	0.0363174	0.0275791	0.0354592	0.032024	0.0115493
														23	0.0407234	0.0355541	0.0407544	0.040274	0.0432484	0.0401109	0.0100139	0.0296629	0.0281505	0.0366717	0.0261632	0.0351461	0.0311589	0.0127482
														23.25	0.037956	0.0388541	0.0406427	0.0319671	0.0482099	0.039526	0.0144623	0.0288926	0.027849	0.0400546	0.0264903	0.0347554	0.0316084	0.0142524
														23.5	0.0358859	0.0355593	0.0413441	0.0361279	0.0475688	0.0392972	0.0136429	0.0279856	0.0314253	0.038747	0.0269828	0.0347959	0.0319873	0.0132029
														23.75	0.0381837	0.0352686	0.0372027	0.0354525	0.0470278	0.0386271	0.0131749	0.0280587	0.0259162	0.0362008	0.0260247	0.0342054	0.0300811	0.0131114
														24	0.0357355	0.033971	0.0397228	0.0354662	0.0482813	0.0386354	0.0144018	0.0270465	0.0263407	0.0332331	0.0260085	0.0342311	0.029372	0.0119828
														24.25	0.0360799	0.0358248	0.0377835	0.0285171	0.0478552	0.0372121	0.0157523	0.02514	0.0253788	0.0344975	0.0250507	0.0320143	0.0284163	0.0126968
														24.5	0.0324274	0.0315131	0.0399516	0.030854	0.0467712	0.0363035	0.0157141	0.0253197	0.0245744	0.031881	0.0248828	0.0348264	0.0282969	0.013022
														24.75	0.0332015	0.0309348	0.0354185	0.0302212	0.0436741	0.03469	0.013926	0.0248729	0.0245496	0.0326388	0.0233105	0.0329514	0.0276646	0.0129961
														25	0.0321753	0.0319979	0.0345271	0.0263876	0.0461608	0.0342497	0.0161604	0.0230571	0.0247096	0.03257	0.0221998	0.0315201	0.0268113	0.0132083
														25.25	0.0301472	0.0311204	0.0337536	0.0282454	0.0408039	0.0328141	0.0132243	0.0228782	0.0223392	0.0310677	0.0233971	0.031398	0.026216	0.0128237
														25.5	0.0320643	0.0307753	0.0325716	0.030382	0.0404916	0.033257	0.0121747	0.0231293	0.0232116	0.0340422	0.0217875	0.0297797	0.0263901	0.013758
														25.75	0.0315513	0.0278827	0.0346641	0.0280732	0.0374293	0.0319201	0.012195	0.0217356	0.0219536	0.0296276	0.021566	0.0277203	0.0245207	0.0117415
														26	0.0300334	0.0286531	0.0319764	0.0261708	0.0364222	0.0306512	0.0117471	0.0216785	0.0204653	0.0296546	0.0218119	0.026142	0.0239505	0.011733
														26.25	0.0316302	0.0275562	0.0339876	0.0245436	0.0330144	0.0301464	0.0119291	0.0209307	0.0215827	0.0290482	0.0220324	0.0256589	0.0238506	0.0110894
														26.5	0.0272564	0.027237	0.0306658	0.027412	0.0327341	0.0290611	0.0094922	0.0217676	0.0196515	0.0258555	0.0194446	0.0246186	0.0222676	0.0101725
														26.75	0.029551	0.023941	0.0304981	0.0265033	0.0312983	0.0283584	0.0104732	0.0225946	0.0198316	0.0279014	0.0200047	0.0233211	0.0227307	0.0108268
														27	0.0263008	0.0266652	0.0294756	0.0262761	0.0292699	0.0275975	0.0076353	0.0185175	0.0213012	0.0264913	0.0191921	0.023295	0.0217595	0.010771
														27.25	0.0276323	0.025229	0.0278842	0.0259027	0.0310014	0.0275299	0.00895869	0.0183146	0.0194033	0.0250431	0.0193358	0.0208365	0.0205867	0.00973346
														27.5	0.0276944	0.0244269	0.0295431	0.0242558	0.0280326	0.0267906	0.00915453	0.0173304	0.0191715	0.0250583	0.0190267	0.02117	0.0203514	0.0102946
														27.75	0.0247446	0.0232353	0.0254295	0.023856	0.0267759	0.0248083	0.00703227	0.0184004	0.0182978	0.0242794	0.0170653	0.0202056	0.0196497	0.0100446
														28	0.0250834	0.0242478	0.0275662	0.0228621	0.0259447	0.0251408	0.0079562	0.0176611	0.0190877	0.0260065	0.0167027	0.0186716	0.0196259	0.0114822
														28.25	0.0258215	0.022796	0.0270979	0.0223569	0.0257923	0.0247729	0.00862453	0.017354	0.0185299	0.0236065	0.0177534	0.0178025	0.0190093	0.00965339
														28.5	0.0241099	0.0225944	0.0264382	0.0202667	0.025583	0.0237984	0.0093782	0.0176664	0.0180867	0.022588	0.0163146	0.0183478	0.0186007	0.00919365
														28.75	0.0222755	0.0220664	0.0257662	0.0224351	0.0231186	0.0231324	0.00738478	0.0165616	0.0185582	0.0235071	0.0161531	0.018354	0.0186268	0.0102341
														29	0.0226468	0.0212878	0.0244317	0.022202	0.0243569	0.022985	0.00701858	0.0158099	0.0171663	0.0223021	0.0165746	0.0176666	0.0179039	0.00955941
														29.25	0.0216392	0.0201071	0.0237994	0.02056	0.0232269	0.0218665	0.00760273	0.0183942	0.0164912	0.0189925	0.0160176	0.0164292	0.0172649	0.00690714
														29.5	0.0223192	0.0218086	0.0226816	0.0204183	0.0229268	0.0220309	0.00596598	0.0166698	0.0161146	0.0228564	0.0159187	0.0162796	0.0175678	0.0103069
														29.75	0.0219954	0.0199166	0.0242894	0.0198694	0.0211817	0.0214505	0.00807415	0.0144776	0.0166	0.021529	0.0148311	0.0170949	0.0169065	0.0100361
														30	0.0206321	0.020611	0.0218444	0.0196334	0.021324	0.020809	0.00546621	0.0147223	0.0150913	0.0202584	0.0142663	0.0154862	0.0159649	0.00934728
														30.25	0.0202334	0.0196445	0.0235639	0.0184987	0.0208782	0.0205638	0.00822734	0.0150752	0.0161818	0.0201567	0.0136219	0.0158682	0.0161808	0.00932967
														30.5	0.0181834	0.0178886	0.0229787	0.0190221	0.0219365	0.0200019	0.00909013	0.0143792	0.0147036	0.0183651	0.0140611	0.016706	0.015643	0.00811045
														30.75	0.0195709	0.0192055	0.0215182	0.0198184	0.0207795	0.0201785	0.00582649	0.0142509	0.0152931	0.0192817	0.0145871	0.0162417	0.0159309	0.00850612
														31	0.0190089	0.0175677	0.0211049	0.0185637	0.0209269	0.0194344	0.00741401	0.0138883	0.0139566	0.0187999	0.0127634	0.015681	0.0150178	0.00918364
														31.25	0.0192409	0.0194999	0.021108	0.0177921	0.0212363	0.0197754	0.00715826	0.0131133	0.0126114	0.0198611	0.0131845	0.0159476	0.0149436	0.0104364
														31.5	0.0165687	0.0171962	0.021544	0.0182423	0.0222187	0.019154	0.00959188	0.0136233	0.013242	0.0180302	0.0137157	0.0161862	0.0149595	0.00861533
														31.75	0.0164519	0.0169277	0.0192964	0.0193587	0.0222297	0.0188529	0.009089	0.0123604	0.0133797	0.0171043	0.0130189	0.0154343	0.0142595	0.00837755
														32	0.0175108	0.0180936	0.0196918	0.0167601	0.0235889	0.019129	0.00985775	0.0121707	0.012826	0.0162399	0.0124884	0.0161437	0.0139737	0.00853959
														32.25	0.0184656	0.0166559	0.018939	0.0166409	0.0219954	0.0185394	0.00886053	0.0124926	0.0121611	0.0164897	0.0128003	0.0153927	0.0138673	0.00834335
														32.5	0.0177411	0.0171794	0.0188913	0.0168717	0.0214367	0.018424	0.00814002	0.0119868	0.012686	0.0153139	0.0122477	0.0153592	0.0135187	0.00774866
														32.75	0.0180812	0.0161811	0.0188646	0.0145933	0.0202582	0.0175957	0.00893869	0.0124524	0.0122901	0.0161607	0.0124954	0.01495	0.0136697	0.00796991
														33	0.0159376	0.0160707	0.0179744	0.0160042	0.0200791	0.0172132	0.00805981	0.0107122	0.0120789	0.0150722	0.0118881	0.0157834	0.013107	0.0088653
														33.25	0.0171789	0.0149695	0.0178166	0.0164485	0.0224627	0.0177752	0.0100564	0.012349	0.0115794	0.0160222	0.0111312	0.0154763	0.0133116	0.00902311
														33.5	0.0172102	0.0150753	0.0177242	0.0150027	0.020701	0.0171427	0.00914516	0.0122611	0.0113422	0.0150571	0.0110231	0.0144119	0.0128191	0.00807158
														33.75	0.0156018	0.0161028	0.0157991	0.0146381	0.0190387	0.0162361	0.00770601	0.0116676	0.0115877	0.0159392	0.0115802	0.0143139	0.0130177	0.00847864
														34	0.0174811	0.0150561	0.016645	0.0144384	0.0186357	0.0164513	0.00785026	0.0107543	0.0115385	0.0135875	0.0109035	0.0141507	0.0121869	0.00750961
														34.25	0.015572	0.0157931	0.0165851	0.0151175	0.0177281	0.0161592	0.00605729	0.0108369	0.0104062	0.0143914	0.0113318	0.0130881	0.0120109	0.00774453
														34.5	0.0151723	0.0148957	0.0156719	0.0147509	0.0166702	0.0154322	0.00526959	0.0101735	0.010198	0.0140103	0.0106813	0.0125109	0.0115148	0.00777974
														34.75	0.0148801	0.0148312	0.0166777	0.0135314	0.016463	0.0152767	0.00682284	0.0104404	0.0107902	0.0141996	0.010355	0.0121507	0.0115872	0.00763351
