# Supplementary material for: Thalamic reticular control of local sleep in mouse sensory cortex
Source: eLife. 2018 Dec 25;7:e39111. doi: 10.7554/eLife.39111 (PMC6342525; doi:10.7554/eLife.39111)
Supplement: Figure 5—source data 1. [file elife-39111-fig5-data1.xlsx]

## Sheet: Figure5
Figure 5 - source Data and statistics underlying Figure 5
(B1)																	(B2)
	Mean amplitude of discrete 9-16Hz events (V²)																		Amplitude (V²)	S1- Cumulative probability distribution of the amplitude (9-16Hz events) during NREM sleep																				S1- Average accross mice					S2- Cumulative probability distribution of the amplitude (9-16Hz events) during NREM sleep
	S1				S2				AC				PFC					Genotype		WT	WT	WT	WT	WT	WT	WT	Cav3.3 KO	Cav3.3 KO	Cav3.3 KO	Cav3.3 KO	Cav3.3 KO	Cav3.3 KO	Cav3.3 KO	Cav3.3 KO	Cav3.3 KO	Cav3.3 KO	Cav3.3 KO	Cav3.3 KO	Cav3.3 KO	WT	WT	Cav3.3 KO	Cav3.3 KO		WT	WT	WT	WT	WT
	Genotye	Mouse	Amplitude		Genotye	Mouse	Amplitude		Genotye	Mouse	Amplitude		Genotye	Mouse	Amplitude			Mouse name		Cw1	Cw2	Cw3	Cw5	Cw6	Cw7	Cw8	Cc1	Cc2	Cc4	Cc5	Cc6	Fc3	Fc4	Gc1	Gc2	Cc7	Cc8	Cc9	Cc10	Mean	Sem	Mean	Sem		Cw8	Cw7	Cw6	Cw5	Cw3
	Cav3.3 KO	Cc1	9.26727e-09		Cav3.3 KO	Cc1	2.35234e-08		Cav3.3 KO	Cc1	5.44331e-09		Cav3.3 KO	Cc1	2.4421e-09				0	0	0	0	0	0	0	0.00681431	0	0.00852878	0.283802	0.840951	0.575318	0.309442	0.204447	0.97954	0.430708	0	0	0	0.598416	0.000973473	0.000973473	0.325473	0.0941337		0	0.288207	0	0	0
	Cav3.3 KO	Cc10	5.03122e-09		Cav3.3 KO	Cc10	4.07407e-09		Cav3.3 KO	Cc10	2.54682e-09		Cav3.3 KO	Cc10	2.48301e-09				5e-09	0.544402	0.26055	0.0151679	0.531646	0.0177324	0.594108	0.770017	0.698712	0.808102	0.950469	0.998781	0.990018	0.956582	0.941974	1	0.978483	0.630642	0.0951195	0.624873	0.992081	0.390518	0.11189	0.820449	0.0721814		0	0.893929	0	0	0
	Cav3.3 KO	Cc2	8.293e-09		Cav3.3 KO	Cc2	1.78543e-08		Cav3.3 KO	Cc2	5.84806e-09		Cav3.3 KO	Cc2	2.35703e-09				1e-08	0.893179	0.779358	0.458288	0.89572	0.432563	0.875614	0.965928	0.969276	0.98081	0.997323	1	0.999093	0.995865	0.994577	1	0.999271	0.933249	0.648406	0.924567	1	0.757236	0.0831659	0.95711	0.0267008		0	0.973482	0	0.00076746	0
	Cav3.3 KO	Cc4	6.16424e-09		Cav3.3 KO	Cc4	4.46205e-09		Cav3.3 KO	Cc5	6.03977e-09		Cav3.3 KO	Cc4	1.45633e-09				1.5e-08	0.967825	0.940367	0.732394	0.98252	0.737238	0.969995	0.993186	0.994054	0.998934	1	1	1	0.999311	1	1	1	0.989828	0.907868	0.982671	1	0.903361	0.0439497	0.990205	0.00701725		0.0448087	0.988137	0.0134897	0.127398	0
	Cav3.3 KO	Cc5	4.03129e-09		Cav3.3 KO	Cc5	8.94585e-09		Cav3.3 KO	Cc6	4.7038e-09		Cav3.3 KO	Cc5	2.53497e-09				2e-08	0.984556	0.984404	0.860238	0.997589	0.898442	0.996727	0.998296	0.998018	1	1	1	1	1	1	1	1	0.997457	0.982072	0.992864	1	0.960036	0.0213635	0.997724	0.00142187		0.284153	0.995813	0.182405	0.399846	0.00137552
	Cav3.3 KO	Cc6	5.09491e-09		Cav3.3 KO	Cc6	1.05173e-08		Cav3.3 KO	Cc7	5.18816e-09		Cav3.3 KO	Cc6	2.67992e-09				2.5e-08	0.994852	0.995413	0.934995	1	0.951639	0.999454	1	1	1	1	1	1	1	1	1	1	0.999364	0.996016	0.997961	1	0.982336	0.0102681	0.999488	0.000330332		0.488525	0.997209	0.401173	0.597084	0.0508941
	Cav3.3 KO	Cc7	9.85228e-09		Cav3.3 KO	Cc7	1.05321e-08		Cav3.3 KO	Cc8	5.60885e-09		Cav3.3 KO	Cc9	2.35705e-09				3e-08	0.998713	0.998165	0.96533	1	0.977969	1	1	1	1	1	1	1	1	1	1	1	0.999364	0.998008	0.998981	1	0.991454	0.00530302	0.999719	0.00016772		0.648087	0.998604	0.573021	0.739064	0.178817
	Cav3.3 KO	Cc8	1.4311e-08		Cav3.3 KO	Cc8	6.66571e-09		Cav3.3 KO	Cc9	5.13542e-09		WT	Cw2	7.42981e-09				3.5e-08	1	1	0.989166	1	0.99194	1	1	1	1	1	1	1	1	1	1	1	1	1	0.998981	1	0.997301	0.00176842	0.999922	7.84122e-05		0.739891	0.999302	0.706158	0.828856	0.31912
	Cav3.3 KO	Cc9	9.97041e-09		Cav3.3 KO	Cc9	1.14169e-08		WT	Cw1	8.23671e-09		WT	Cw3	3.98879e-09				4e-08	1	1	0.994583	1	0.995701	1	1	1	1	1	1	1	1	1	1	1	1	1	1	1	0.998612	0.000904208	1	0		0.825137	1	0.8	0.884881	0.449794
	Cav3.3 KO	Fc3	6.12809e-09		Cav3.3 KO	Fc3	1.78484e-08		WT	Cw2	7.52192e-09		WT	Cw5	3.07481e-09				4.5e-08	1	1	0.995666	1	0.997313	1	1	1	1	1	1	1	1	1	1	1	1	1	1	1	0.998997	0.000671856	1	0		0.869945	1	0.858065	0.924021	0.554333
	Cav3.3 KO	Fc4	6.51253e-09		Cav3.3 KO	Fc4	9.08357e-09		WT	Cw3	6.09657e-09		WT	Cw6	4.98883e-09				5e-08	1	1	1	1	0.998925	1	1	1	1	1	1	1	1	1	1	1	1	1	1	1	0.999846	0.000153525	1	0		0.912568	1	0.907918	0.96086	0.64099
	Cav3.3 KO	Gc1	2.55491e-09		Cav3.3 KO	Gc1	3.96746e-09		WT	Cw6	6.64645e-09		WT	Cw7	2.03634e-09				5.5e-08	1	1	1	1	1	1	1	1	1	1	1	1	1	1	1	1	1	1	1	1	1	0	1	0		0.947541	1	0.946041	0.971604	0.715268
	Cav3.3 KO	Gc2	5.61195e-09		Cav3.3 KO	Gc2	1.56733e-08		WT	Cw7	3.68809e-09		WT	Cw8	4.92529e-09				6e-08	1	1	1	1	1	1	1	1	1	1	1	1	1	1	1	1	1	1	1	1	1	0	1	0		0.971585	1	0.96305	0.983883	0.762036
	WT	Cw1	1.07507e-08		WT	Cw2	2.38952e-08		WT	Cw8	5.283e-09								6.5e-08	1	1	1	1	1	1	1	1	1	1	1	1	1	1	1	1	1	1	1	1	1	0	1	0		0.982514	1	0.97478	0.989256	0.822558
	WT	Cw2	1.27493e-08		WT	Cw3	5.38779e-08												7e-08	1	1	1	1	1	1	1	1	1	1	1	1	1	1	1	1	1	1	1	1	1	0	1	0		0.990164	1	0.985337	0.992325	0.855571
	WT	Cw3	1.76354e-08		WT	Cw5	3.05904e-08												7.5e-08	1	1	1	1	1	1	1	1	1	1	1	1	1	1	1	1	1	1	1	1	1	0	1	0		0.995628	1	0.990029	0.996163	0.876204
	WT	Cw5	1.05888e-08		WT	Cw6	3.60652e-08												8e-08	1	1	1	1	1	1	1	1	1	1	1	1	1	1	1	1	1	1	1	1	1	0	1	0		0.997814	1	0.991789	0.998465	0.905089
	WT	Cw6	1.74906e-08		WT	Cw7	6.80534e-09												8.5e-08	1	1	1	1	1	1	1	1	1	1	1	1	1	1	1	1	1	1	1	1	1	0	1	0		0.998907	1	0.994721	0.998465	0.917469
	WT	Cw7	1.03086e-08		WT	Cw8	3.40756e-08												9e-08	1	1	1	1	1	1	1	1	1	1	1	1	1	1	1	1	1	1	1	1	1	0	1	0		1	1	0.997654	0.999233	0.9326
	WT	Cw8	8.56846e-09																9.5e-08	1	1	1	1	1	1	1	1	1	1	1	1	1	1	1	1	1	1	1	1	1	0	1	0		1	1	0.99824	1	0.944979
																			1e-07	1	1	1	1	1	1	1	1	1	1	1	1	1	1	1	1	1	1	1	1	1	0	1	0		1	1	0.99824	1	0.958735
	WT	Mean	1.25846e-08		WT	Mean	3.08849e-08		WT	Mean	6.24546e-09		WT	Mean	4.40731e-09				1.05e-07	1	1	1	1	1	1	1	1	1	1	1	1	1	1	1	1	1	1	1	1	1	0	1	0		1	1	0.998827	1	0.966988
	Cav3.3 KO	Mean	7.14024e-09		Cav3.3 KO	Mean	1.11203e-08		Cav3.3 KO	Mean	5.06427e-09		Cav3.3 KO	Mean	2.33006e-09				1.1e-07	1	1	1	1	1	1	1	1	1	1	1	1	1	1	1	1	1	1	1	1	1	0	1	0		1	1	0.999413	1	0.971114
	WT	sem	1.36506e-09		WT	sem	6.30994e-09		WT	sem	6.64426e-10		WT	sem	7.59698e-10				1.15e-07	1	1	1	1	1	1	1	1	1	1	1	1	1	1	1	1	1	1	1	1	1	0	1	0		1	1	0.999413	1	0.97249
	Cav3.3 KO	sem	8.64794e-10		Cav3.3 KO	sem	1.67914e-09		Cav3.3 KO	sem	3.89461e-10		Cav3.3 KO	sem	1.51595e-10				1.2e-07	1	1	1	1	1	1	1	1	1	1	1	1	1	1	1	1	1	1	1	1	1	0	1	0		1	1	1	1	0.976616
																			1.25e-07	1	1	1	1	1	1	1	1	1	1	1	1	1	1	1	1	1	1	1	1	1	0	1	0		1	1	1	1	0.984869
																			1.3e-07	1	1	1	1	1	1	1	1	1	1	1	1	1	1	1	1	1	1	1	1	1	0	1	0		1	1	1	1	0.988996
																			1.35e-07	1	1	1	1	1	1	1	1	1	1	1	1	1	1	1	1	1	1	1	1	1	0	1	0		1	1	1	1	0.994498
	Shapiro-Wilk statistic																		1.4e-07	1	1	1	1	1	1	1	1	1	1	1	1	1	1	1	1	1	1	1	1	1	0	1	0		1	1	1	1	0.997249
	S1				S2				AC				PFC						1.45e-07	1	1	1	1	1	1	1	1	1	1	1	1	1	1	1	1	1	1	1	1	1	0	1	0		1	1	1	1	0.998625
	WT	W	0.844438		WT	W	0.967452		WT	W	0.998237		WT	W	0.964867				1.5e-07	1	1	1	1	1	1	1	1	1	1	1	1	1	1	1	1	1	1	1	1	1	0	1	0		1	1	1	1	1
	WT	p	0.109245		WT	p	0.8749		WT	p	0.999822		WT	p	0.856347				1.55e-07	1	1	1	1	1	1	1	1	1	1	1	1	1	1	1	1	1	1	1	1	1	0	1	0		1	1	1	1	1
	Cav3.3 KO	W	0.934599		Cav3.3 KO	W	0.925876		Cav3.3 KO	W	0.779534		Cav3.3 KO	W	0.71841				1.6e-07	1	1	1	1	1	1	1	1	1	1	1	1	1	1	1	1	1	1	1	1	1	0	1	0		1	1	1	1	1
	Cav3.3 KO	p	0.390856		Cav3.3 KO	p	0.300706		Cav3.3 KO	p	0.0172177		Cav3.3 KO	p	0.00586818				1.65e-07	1	1	1	1	1	1	1	1	1	1	1	1	1	1	1	1	1	1	1	1	1	0	1	0		1	1	1	1	1
																			1.7e-07	1	1	1	1	1	1	1	1	1	1	1	1	1	1	1	1	1	1	1	1	1	0	1	0		1	1	1	1	1
	Wilcoxon-Mann-Whitney two-sample rank test																		1.75e-07	1	1	1	1	1	1	1	1	1	1	1	1	1	1	1	1	1	1	1	1	1	0	1	0		1	1	1	1	1
			S1	S2		AC		PFC											1.8e-07	1	1	1	1	1	1	1	1	1	1	1	1	1	1	1	1	1	1	1	1	1	0	1	0		1	1	1	1	1
	WT vs Cav3.3 KO		0.00242518	0.00622881		0.107892		0.0320513											1.85e-07	1	1	1	1	1	1	1	1	1	1	1	1	1	1	1	1	1	1	1	1	1	0	1	0		1	1	1	1	1
																			1.9e-07	1	1	1	1	1	1	1	1	1	1	1	1	1	1	1	1	1	1	1	1	1	0	1	0		1	1	1	1	1
																			1.95e-07	1	1	1	1	1	1	1	1	1	1	1	1	1	1	1	1	1	1	1	1	1	0	1	0		1	1	1	1	1
	S1	•StatsWilcoxonRankTest WT_S1_916OscPwrAvg vs. KO_S1_916OscPwrAvg 1 KO_S1_916OscPwrAvg 1																	2e-07	1	1	1	1	1	1	1	1	1	1	1	1	1	1	1	1	1	1	1	1	1	0	1	0		1	1	1	1	1
		Mann-Whitney Wilcoxon Test:																	2.05e-07	1	1	1	1	1	1	1	1	1	1	1	1	1	1	1	1	1	1	1	1	1	0	1	0		1	1	1	1	1
		m = 7																	2.1e-07	1	1	1	1	1	1	1	1	1	1	1	1	1	1	1	1	1	1	1	1	1	0	1	0		1	1	1	1	1
		n = 13																	2.15e-07	1	1	1	1	1	1	1	1	1	1	1	1	1	1	1	1	1	1	1	1	1	0	1	0		1	1	1	1	1
		totalPoints = 20																	2.2e-07	1	1	1	1	1	1	1	1	1	1	1	1	1	1	1	1	1	1	1	1	1	0	1	0		1	1	1	1	1
		U_statistic = 82																	2.25e-07	1	1	1	1	1	1	1	1	1	1	1	1	1	1	1	1	1	1	1	1	1	0	1	0		1	1	1	1	1
		Up_statistic = 9																	2.3e-07	1	1	1	1	1	1	1	1	1	1	1	1	1	1	1	1	1	1	1	1	1	0	1	0		1	1	1	1	1
																			2.35e-07	1	1	1	1	1	1	1	1	1	1	1	1	1	1	1	1	1	1	1	1	1	0	1	0		1	1	1	1	1
		Two tailed P-value is: P(U'<=9|7,13)+P(U>=82|7,13)= 0.00242518																	2.4e-07	1	1	1	1	1	1	1	1	1	1	1	1	1	1	1	1	1	1	1	1	1	0	1	0		1	1	1	1	1
		alpha=0.05>P=0.00242518 ==> H0 Rejected.																	2.45e-07	1	1	1	1	1	1	1	1	1	1	1	1	1	1	1	1	1	1	1	1	1	0	1	0		1	1	1	1	1
		pvalue saved is: 0.00242518
	S2	•StatsWilcoxonRankTest WT_S2_916OscPwrAvg vs. KO_S2_916OscPwrAvg 1 KO_S2_916OscPwrAvg 1
		Mann-Whitney Wilcoxon Test:
		m = 6
		n = 13
		totalPoints = 19
		U_statistic = 69
		Up_statistic = 9
		Two tailed P-value is: P(U'<=9|6,13)+P(U>=69|6,13)= 0.00622881
		alpha=0.05>P=0.00622881 ==> H0 Rejected.
		pvalue saved is: 0.00622881
	AC	•StatsWilcoxonRankTest WT_A1_916OscPwrAvg vs. KO_A1_916OscPwrAvg 1 KO_A1_916OscPwrAvg 1
		Mann-Whitney Wilcoxon Test:
		m = 6
		n = 8
		totalPoints = 14
		U_statistic = 37
		Up_statistic = 11
		Two tailed P-value is: P(U'<=11|6,8)+P(U>=37|6,8)= 0.107892
		alpha=0.05<=P=0.107892 ==> H0 Accepted.
		pvalue saved is: 0.107892
	PFC	•StatsWilcoxonRankTest WT_PF_916OscPwrAvg vs. KO_PF_916OscPwrAvg 1 KO_PF_916OscPwrAvg 1
		Mann-Whitney Wilcoxon Test:
		m = 6
		n = 7
		totalPoints = 13
		U_statistic = 36
		Up_statistic = 6
		Two tailed P-value is: P(U'<=6|6,7)+P(U>=36|6,7)= 0.0320513
		alpha=0.05>P=0.0320513 ==> H0 Rejected.
		pvalue saved is: 0.0320513
[truncated: 147 more columns]
