# Supplementary material for: Thalamic reticular control of local sleep in mouse sensory cortex
Source: eLife. 2018 Dec 25;7:e39111. doi: 10.7554/eLife.39111 (PMC6342525; doi:10.7554/eLife.39111)
Supplement: Figure 6—source data 1. [file elife-39111-fig6-data1.xlsx]

## Sheet: Figure6
Figure 6 - source Data and statistics underlying Figure 6
(B)
	S1- Distribution of sleep spindle occurrence as a function of Slow-Oscillation phase (%)																				S1- Average accross mice					S2- Distribution of sleep spindle occurrence as a function of Slow-Oscillation phase (%)																			S2- Average accross mice
Genotype	WT	WT	WT	WT	WT	WT	WT	Cav3.3 KO	Cav3.3 KO	Cav3.3 KO	Cav3.3 KO	Cav3.3 KO	Cav3.3 KO	Cav3.3 KO	Cav3.3 KO	Cav3.3 KO	Cav3.3 KO	Cav3.3 KO	Cav3.3 KO	Cav3.3 KO	WT	Cav3.3 KO	WT	Cav3.3 KO		WT	WT	WT	WT	WT	WT	Cav3.3 KO	Cav3.3 KO	Cav3.3 KO	Cav3.3 KO	Cav3.3 KO	Cav3.3 KO	Cav3.3 KO	Cav3.3 KO	Cav3.3 KO	Cav3.3 KO	Cav3.3 KO	Cav3.3 KO	Cav3.3 KO	WT	Cav3.3 KO	WT	Cav3.3 KO
Mouse name	Cw1	Cw2	Cw3	Cw5	Cw6	Cw7	Cw8	Cc1	Cc10	Cc2	Cc4	Cc5	Cc6	Cc7	Cc8	Cc9	Fc3	Fc4	Gc1	Gc2	Mean	Mean	Sem	Sem		Cw2	Cw3	Cw5	Cw6	Cw7	Cw8	Cc1	Cc10	Cc2	Cc4	Cc5	Cc6	Cc7	Cc8	Cc9	Fc3	Fc4	Gc1	Gc2	Mean	Mean	Sem	Sem
	5.2356	5.86643	4.0568	3.95349	5.65832	4.21496	5.75139	3.52423	4.66321	5.09978	1.60256	4.59184	2.32558	4.40636	2.60771	5.70866	4.79042	4.41335	3.88889	4.20712	4.96243	3.9869	0.3235	0.326688		3.6	4.72727	4.46602	3.91566	3.90244	3.96341	3.79147	5.65553	2.65957	2.57353	4.20168	5.36082	4.58453	3.88248	4.52675	5.02793	5.00659	5.18293	3.60134	4.0958	4.31193	0.170196	0.271563
	5.2356	4.06137	2.83976	5.93023	4.89663	3.79347	3.33952	4.62555	3.88601	4.43459	4.48718	3.18878	5.28541	4.03917	3.06122	4.72441	5.23952	6.35091	4.16667	4.28803	4.29951	4.44442	0.415684	0.24225		4.13333	4.36364	5.04854	4.06627	4.22764	3.96341	2.60664	3.85604	3.45745	4.04412	3.22129	4.12371	3.15186	4.72193	4.52675	2.93296	3.55731	5.4878	3.01508	4.30047	3.74638	0.159719	0.227587
	4.18848	5.59567	3.0426	5.34884	5.22307	4.42571	4.45269	4.40529	3.88601	4.43459	2.88462	4.46429	5.49683	3.30477	2.04082	3.93701	5.08982	3.98278	4.44444	4.69256	4.61101	4.08183	0.330455	0.255329		3.73333	3.27273	3.49515	3.16265	2.92683	2.7439	2.36967	3.59897	2.92553	2.57353	2.38095	2.8866	5.01433	4.82686	3.49794	2.51397	2.7668	4.57317	2.59631	3.22243	3.27113	0.148084	0.265002
	5.49738	5.59567	5.67951	4.4186	5.98477	6.84932	5.00928	2.64317	2.33161	5.76497	5.12821	5.48469	4.43975	2.69278	2.26757	4.92126	5.38922	4.19806	4.72222	3.72168	5.57636	4.13117	0.287288	0.351859		4.8	5.09091	3.1068	4.96988	3.08943	4.87805	3.08057	6.42674	2.65957	4.77941	1.82073	3.09278	2.86533	4.40714	2.05761	3.35196	2.10804	2.7439	3.51759	4.32251	3.30087	0.389212	0.352581
	5.49738	4.60289	4.0568	6.97674	7.50816	5.37408	5.56586	2.20264	3.62694	3.7694	3.84615	5.10204	5.074	4.28397	2.72109	3.54331	5.83832	3.87513	4.16667	4.12621	5.65456	4.01353	0.461729	0.267654		2.8	5.81818	5.43689	4.81928	3.41463	6.70732	2.60664	5.14139	2.39362	3.67647	3.5014	3.29897	3.86819	4.617	3.29218	2.09497	1.97628	2.7439	2.93132	4.83272	3.24172	0.605348	0.259906
	6.5445	7.12996	6.49087	6.27907	4.57019	5.58483	5.19481	4.84582	3.62694	3.7694	5.12821	4.97449	3.17125	3.30477	2.38095	4.52756	5.38922	3.87513	4.72222	3.47896	5.9706	4.09192	0.336338	0.251008		5.2	5.81818	4.46602	6.3253	3.08943	6.09756	3.5545	5.65553	2.92553	1.83824	4.48179	1.64948	3.0086	5.77125	3.49794	2.09497	1.58103	4.87805	1.9263	5.16608	3.29717	0.498009	0.416229
	4.97382	4.51264	5.88235	5.69767	5.98477	6.00632	5.00928	4.18502	6.21762	4.43459	5.12821	3.95408	6.13108	4.28397	2.1542	2.3622	4.64072	3.87513	6.11111	4.04531	5.43812	4.42486	0.225852	0.355052		6.13333	5.81818	4.27184	6.92771	4.22764	3.04878	3.79147	5.39846	2.65957	1.83824	3.92157	3.71134	3.15186	5.24659	3.7037	3.63129	1.84453	3.04878	2.59631	5.07125	3.42644	0.593674	0.302768
	4.71204	6.76895	7.50507	6.27907	7.94342	5.47945	4.08163	3.30396	3.62694	3.54767	7.05128	5.9949	3.38266	4.89596	3.51474	1.9685	4.34132	4.95156	6.11111	4.36893	6.10995	4.3892	0.539766	0.386554		6.66667	5.09091	4.66019	6.0241	4.39024	7.92683	6.63507	6.94087	1.8617	3.67647	5.18207	4.94845	2.43553	4.82686	4.52675	3.63129	3.42556	1.82927	3.76884	5.79316	4.1299	0.551175	0.445684
	6.02094	5.05415	6.69371	6.16279	5.76714	5.2687	7.05009	2.64317	4.40415	3.99113	7.69231	4.46429	4.86258	3.79437	4.98866	3.34646	4.04192	3.22928	5.83333	3.47896	6.0025	4.36697	0.271437	0.362697		6.53333	6.90909	4.66019	6.77711	5.20325	6.40244	4.2654	4.62725	3.7234	4.77941	2.38095	3.71134	3.58166	5.24659	3.90947	4.88827	3.16206	4.26829	4.0201	6.0809	4.0434	0.377154	0.213769
	5.2356	4.69314	6.28803	5.46512	5.65832	5.6902	5.38033	3.74449	4.40415	5.32151	5.44872	3.57143	4.01691	3.91677	3.7415	4.92126	4.19162	5.59742	2.77778	4.53074	5.48725	4.32187	0.183716	0.229232		5.86667	6.54545	8.93204	7.83133	5.04065	6.70732	4.73934	7.19794	2.39362	4.77941	5.04202	3.50515	3.58166	3.77754	4.11523	3.07263	3.82082	0.914634	4.0201	6.82058	3.92001	0.567053	0.407137
	6.02094	4.06137	3.44828	5.34884	4.57019	5.2687	4.08163	3.30396	4.40415	4.43459	4.48718	5.10204	6.55391	3.91677	4.42177	2.16535	3.44311	3.87513	4.16667	4.69256	4.68571	4.22825	0.34023	0.283268		5.33333	8	4.85437	4.81928	4.55285	6.09756	3.79147	3.08483	3.19149	3.67647	2.52101	4.12371	3.58166	3.98741	4.32099	2.65363	3.82082	3.96341	3.76884	5.60956	3.57583	0.527262	0.153608
	3.40314	4.60289	5.07099	4.30233	4.46137	4.42571	5.00928	4.62555	4.92228	3.7694	5.76923	4.97449	6.13108	3.91677	5.66893	2.16535	3.14371	4.19806	6.11111	3.80259	4.46796	4.55374	0.209192	0.333558		6.26667	8.36364	4.07767	6.1747	6.34146	5.4878	4.50237	5.65553	5.31915	4.77941	3.36134	4.94845	2.72206	4.19727	3.29218	2.7933	3.16206	3.04878	2.84757	6.11866	3.89457	0.567985	0.289429
	3.66492	3.4296	2.63692	3.02326	2.93798	4.84721	5.19481	5.94714	5.18135	3.7694	4.48718	4.59184	4.43975	4.52876	4.7619	3.54331	5.23952	4.62863	5	4.85437	3.67638	4.69024	0.371284	0.170926		3.46667	4.72727	4.46602	5.27108	4.55285	6.40244	4.02844	2.57069	2.39362	4.41176	3.36134	4.53608	4.15473	5.24659	4.11523	2.7933	3.16206	3.04878	2.93132	4.81439	3.59646	0.397668	0.242429
	4.45026	2.61733	4.86815	2.90698	3.80849	3.89884	4.26716	4.62555	5.69948	5.09978	3.84615	4.33673	3.17125	4.03917	3.7415	2.75591	3.59281	3.33692	4.72222	4.53074	3.83103	4.11525	0.307886	0.228781		3.86667	2.90909	3.68932	3.31325	6.17886	5.4878	5.92417	5.9126	3.7234	3.30882	5.04202	5.15464	4.15473	2.83316	3.7037	3.91061	4.74308	3.35366	3.01508	4.24083	4.21382	0.528804	0.290452
	2.35602	3.33935	4.25964	2.67442	2.06746	2.95047	3.52505	4.62555	2.07254	1.55211	5.44872	3.69898	2.11416	4.65116	3.28798	4.33071	4.19162	3.65985	4.44444	5.42071	3.02463	3.80758	0.283097	0.346889		4.66667	3.63636	5.82524	3.61446	3.08943	2.43902	5.21327	3.3419	5.05319	2.94118	4.34174	3.91753	3.29513	3.56768	4.32099	3.07263	4.08432	5.18293	4.94137	3.87853	4.09799	0.491056	0.227495
	3.66492	2.61733	1.21704	1.86047	2.72035	2.31823	4.08163	4.84582	3.36788	4.21286	6.41026	2.93367	4.65116	4.16157	4.30839	4.13386	4.64072	3.76749	3.61111	4.44984	2.63999	4.26882	0.373904	0.234091		3.6	2.54545	2.91262	2.86145	4.22764	3.04878	5.21327	4.11311	2.92553	5.14706	4.90196	4.74227	4.58453	3.56768	4.11523	5.44693	4.21607	3.04878	5.10888	3.19932	4.39471	0.249302	0.228017
	3.9267	2.88809	2.43408	2.09302	1.41458	1.89673	4.45269	5.50661	3.36788	5.54324	3.52564	4.33673	3.17125	5.14076	5.66893	4.52756	2.84431	4.30571	3.05556	4.93528	2.72941	4.30226	0.418123	0.282495		2.66667	2.54545	2.91262	2.56024	4.39024	2.43902	2.8436	4.11311	6.11702	6.25	5.60224	4.94845	3.72493	3.56768	4.11523	5.02793	4.21607	3.65854	6.95142	2.91904	4.70279	0.30149	0.341067
	3.14136	3.33935	5.67951	2.55814	1.95865	2.21286	1.85529	7.26872	4.14508	3.54767	3.20513	4.08163	2.95983	3.91677	5.55556	4.52756	4.94012	4.84392	3.33333	4.77346	2.96359	4.39221	0.500363	0.320001		3.6	1.45455	3.30097	1.80723	4.71545	4.26829	6.63507	4.88432	5.31915	3.30882	5.32213	2.8866	3.4384	4.19727	4.32099	5.44693	7.77339	4.26829	5.36013	3.19108	4.85858	0.535225	0.376042
	2.09424	3.79061	2.83976	2.44186	2.39391	3.2666	2.78293	5.06608	3.10881	5.9867	3.20513	4.33673	4.43975	4.89596	7.25624	4.52756	2.99401	4.95156	2.77778	5.01618	2.80141	4.50481	0.21779	0.354744		4.4	2.18182	3.30097	2.71084	4.22764	1.82927	6.87204	2.05656	8.7766	4.41176	5.18207	6.80412	4.87106	3.98741	6.79012	5.86592	6.71937	4.57317	5.86265	3.10842	5.59791	0.432466	0.468881
	2.87958	3.06859	3.44828	2.55814	2.28509	2.8451	3.15399	4.84582	6.47668	4.43459	3.20513	3.95408	2.95983	5.50796	5.55556	3.93701	3.14371	3.65985	3.05556	4.61165	2.89125	4.25749	0.145685	0.307021		2.8	1.45455	3.30097	2.56024	4.22764	1.52439	2.36967	1.79949	7.44681	6.25	4.48179	4.12371	7.02006	3.98741	3.29218	7.26257	6.06061	6.09756	7.78894	2.64463	5.22929	0.433559	0.556511
	2.09424	3.33935	2.83976	2.90698	2.39391	3.37197	1.66976	2.64317	3.36788	4.21286	1.28205	3.06122	4.65116	5.99755	6.9161	7.08661	3.89222	3.12164	3.05556	3.07443	2.65942	4.02788	0.240693	0.477179		2.4	1.09091	2.52427	2.71084	3.57724	2.7439	4.50237	2.57069	6.38298	6.61765	5.46218	4.53608	5.44413	3.25289	4.32099	5.86592	7.11462	5.4878	6.78392	2.50786	5.25709	0.329653	0.380626
	2.35602	3.61011	3.24544	3.02326	2.50272	2.21286	2.22635	3.30396	4.14508	2.43902	1.92308	3.06122	2.74841	2.93758	5.21542	6.29921	2.54491	2.79871	1.66667	2.75081	2.73953	3.21801	0.209208	0.359946		2.93333	2.54545	3.30097	1.95783	4.06504	2.13415	2.36967	2.31362	7.44681	4.77941	4.7619	4.74227	5.15759	2.83316	5.76132	5.58659	6.19236	4.57317	5.19263	2.8228	4.74696	0.320591	0.414066
	3.66492	1.98556	2.83976	3.13953	2.82916	4.32034	3.15399	2.86344	4.66321	2.43902	2.88462	2.16837	4.01691	4.28397	3.7415	5.70866	2.69461	3.44456	4.72222	2.91262	3.13332	3.58029	0.275513	0.291558		1.86667	2.54545	2.3301	2.40964	2.11382	2.7439	4.50237	1.79949	4.52128	3.67647	4.20168	4.53608	5.73066	2.72823	4.11523	6.14525	4.74308	6.09756	3.8526	2.33493	4.35769	0.127193	0.342853
	3.14136	3.4296	2.63692	4.65116	4.46137	3.47734	3.71058	4.40529	4.40415	3.99113	1.92308	3.57143	3.8055	3.18237	4.42177	4.33071	3.74252	5.0592	3.33333	3.23625	3.64405	3.80052	0.268484	0.219516		2.66667	2.54545	4.66019	2.40964	4.22764	0.914634	3.79147	1.28535	3.7234	5.88235	5.32213	3.71134	6.87679	4.72193	5.76132	4.88827	4.74308	7.92683	3.60134	2.90404	4.78735	0.55447	0.464264
[truncated: 63 more columns]
