# Supplementary figures and images for: Thalamic reticular control of local sleep in mouse sensory cortex
Source: eLife journal article supplement (doi:10.7554/elife.39111), 2018-12-24

**A**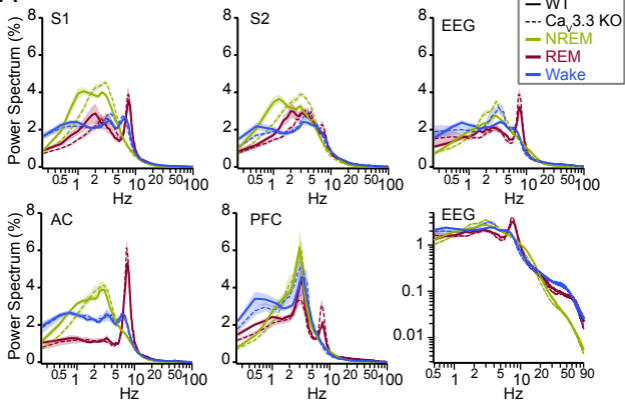**B**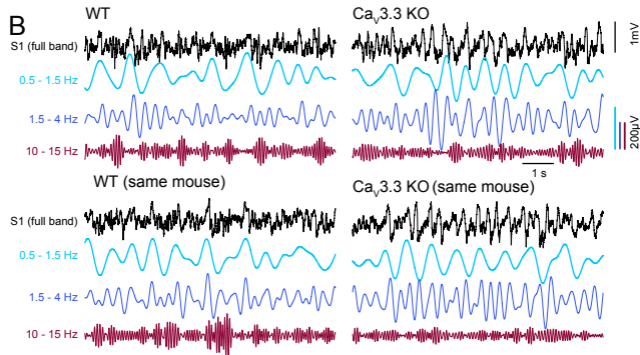

Supplement: supp [file elife-39111-supp-v1.zip]

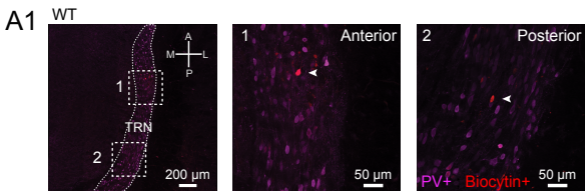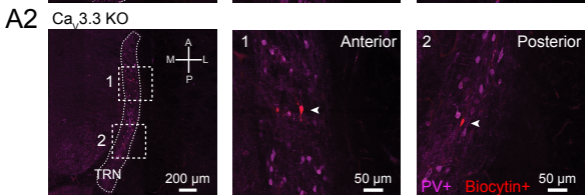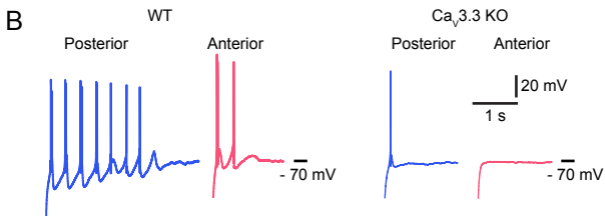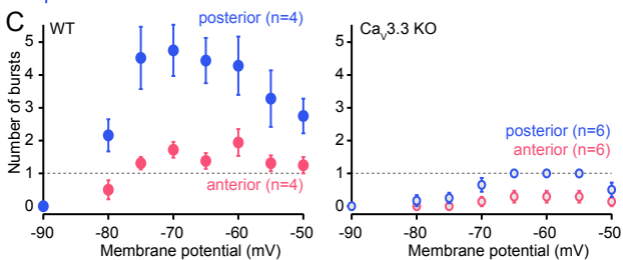

Supplement: supp [file elife-39111-supp-v1.zip]

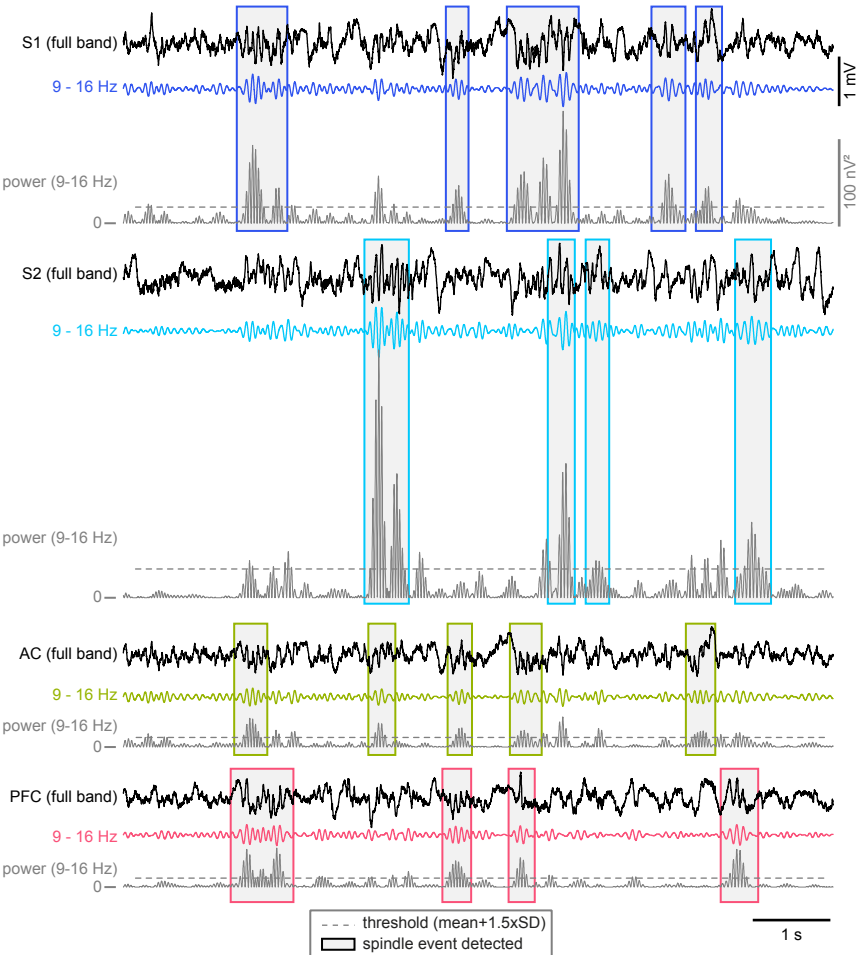

Supplement: supp [file elife-39111-supp-v1.zip]

A

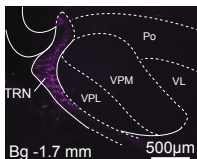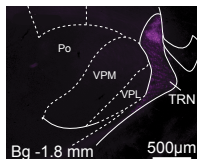

B

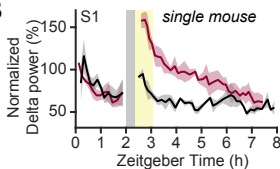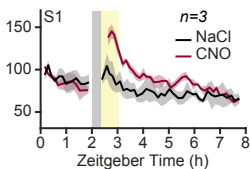

C

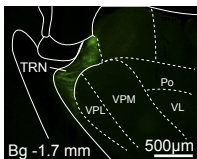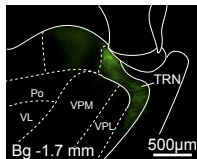

D

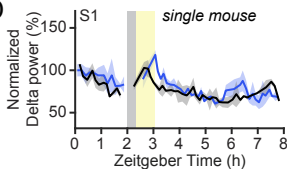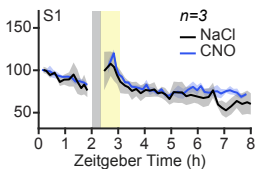

E

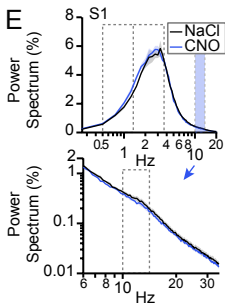

F

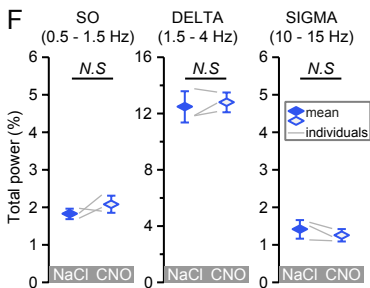

Supplement: supp [file elife-39111-supp-v1.zip]
